# Supplementary material
Source: PubMed Central journal article supplement (PMC4288254)

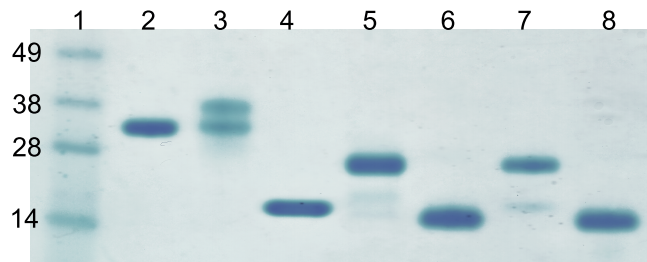

**Supplemental figure 1.**

SDS-PAGE analysis of allergens used in this study. Lane 1: molecular standard, lane 2: Phl p 1, lane 3: Phl p 5, lane 4: Bet v 1, lane 5: Der p 1, lane 6: Der p 2, lane 7: Der f 1, lane 8: Der f 2.

## Supplemental figure 2.

MALDI TOF analysis of individual allergens.

MALDI was operated in linear mode using 2000 shots/spot for each allergen and 1  $\mu\text{g}$  protein was mixed with sinapinic acid for each spot.

Phl p 1

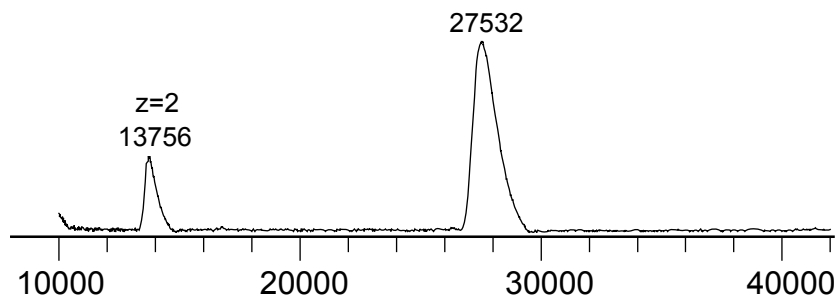

Phl p 5

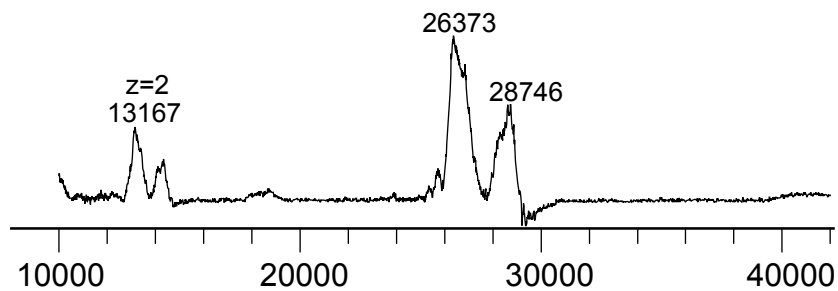

Bet v 1

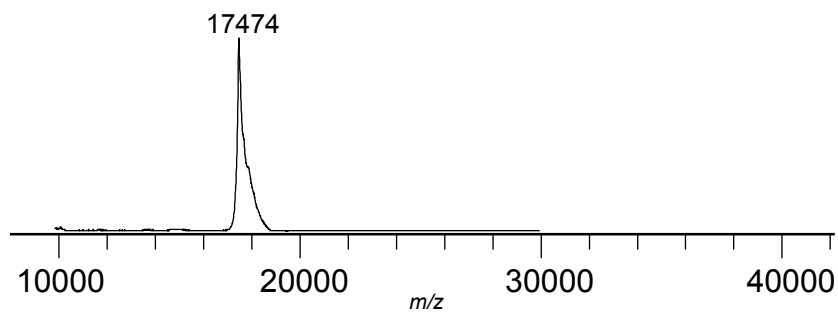

Der p 1

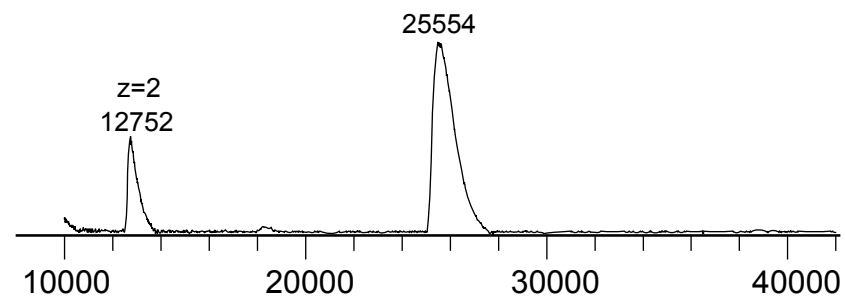

Der p 2

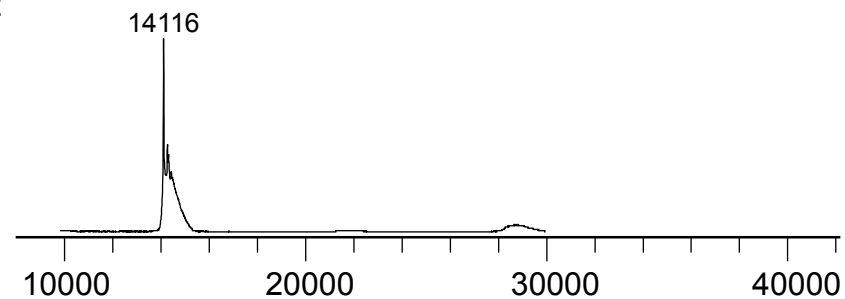

Der f 1

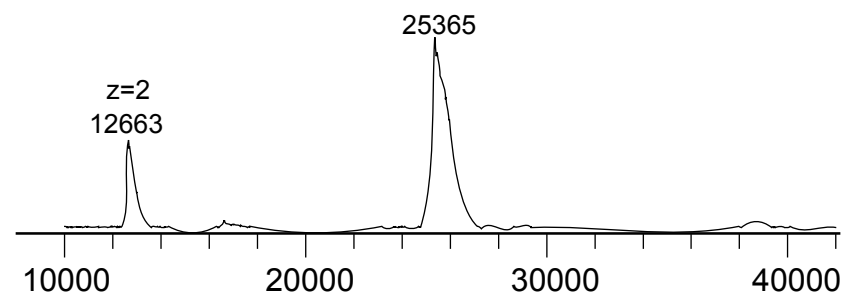

Der f 2

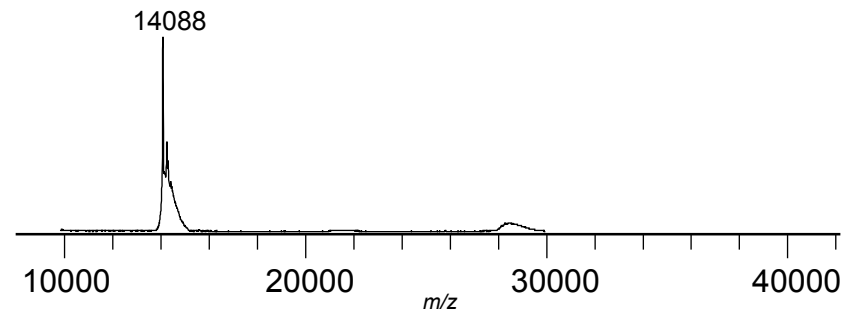

### Supplemental figure 3.

MALDI TOF analysis of Der p2 and Der f 2.

Insert shows  $m/z$  13600-15200 mass range. A second minor peak representing 162 amu mass increment can be seen for both allergens.

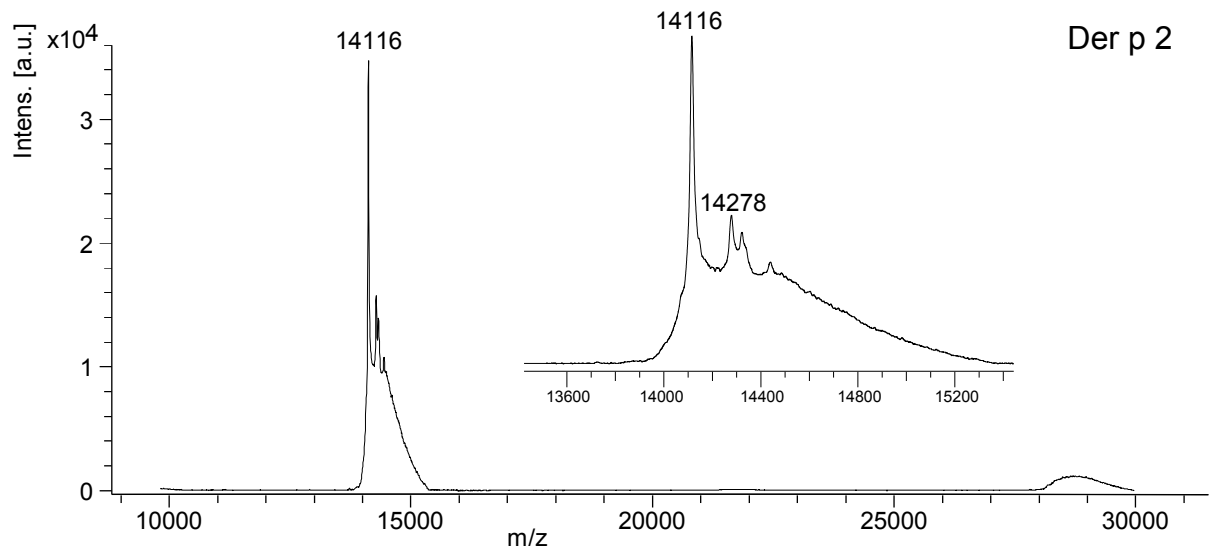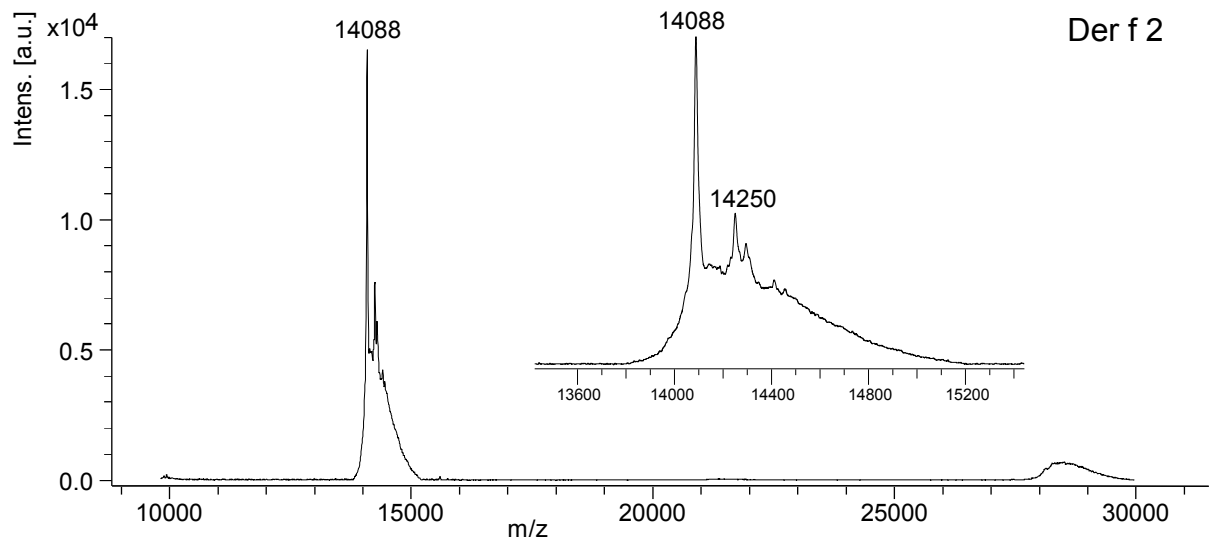

# Supplemental figure 4.

Annotated HCD-MS2 spectra of Phl p 1 N-glycopeptides identified in this study.

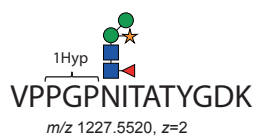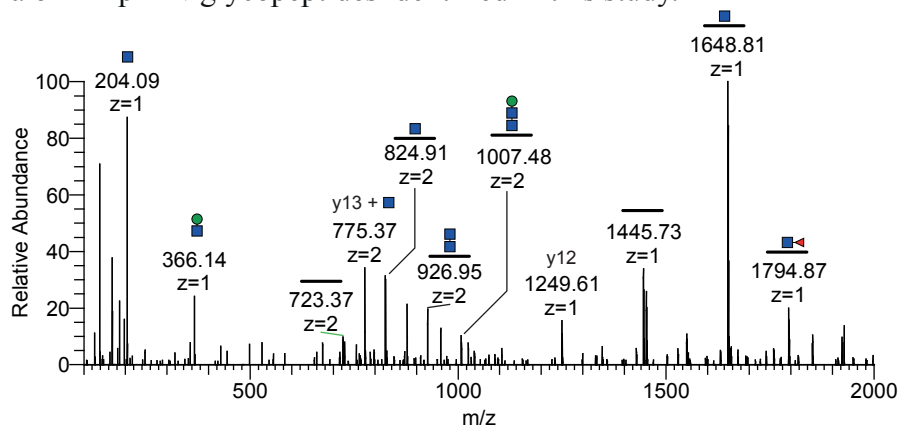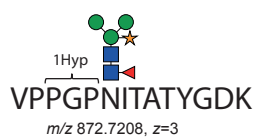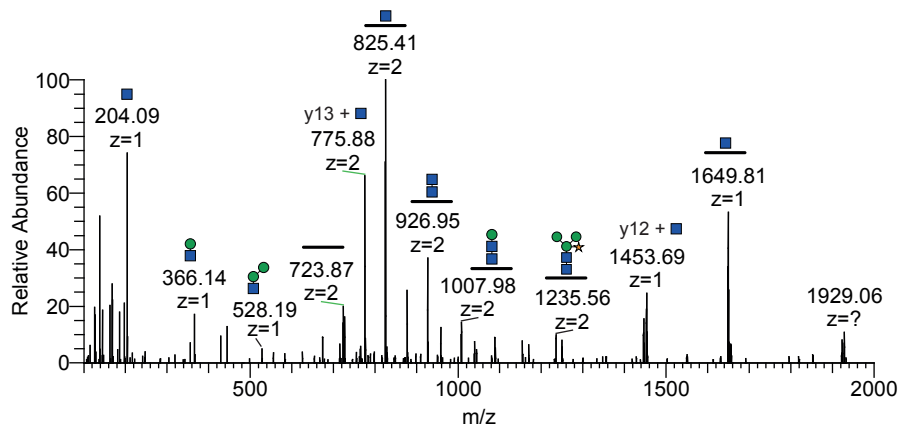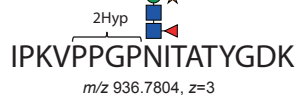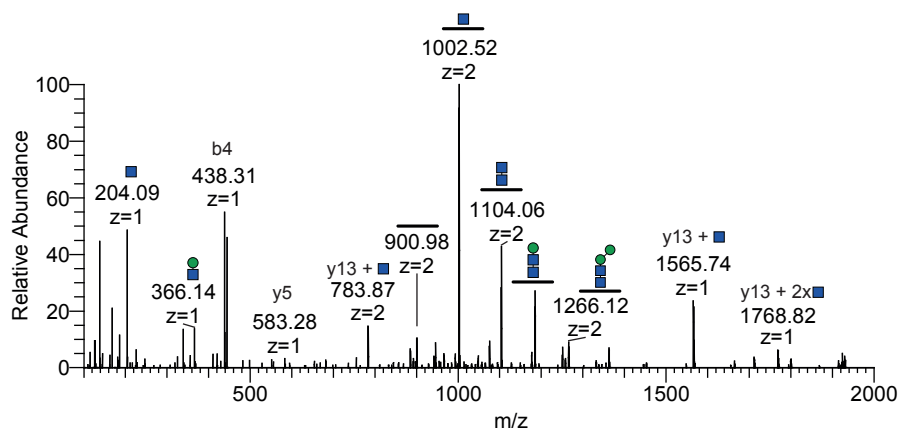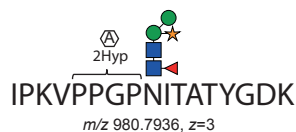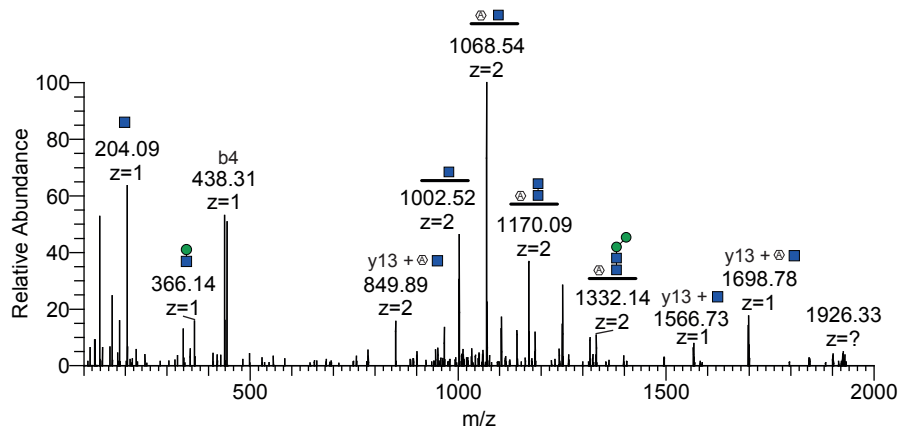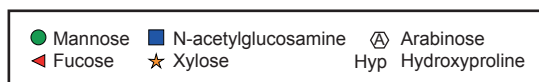

# Supplemental figure 4.

Annotated HCD-MS2 spectra of Phl p 1 N-glycopeptides identified in this study.

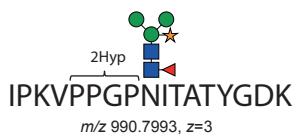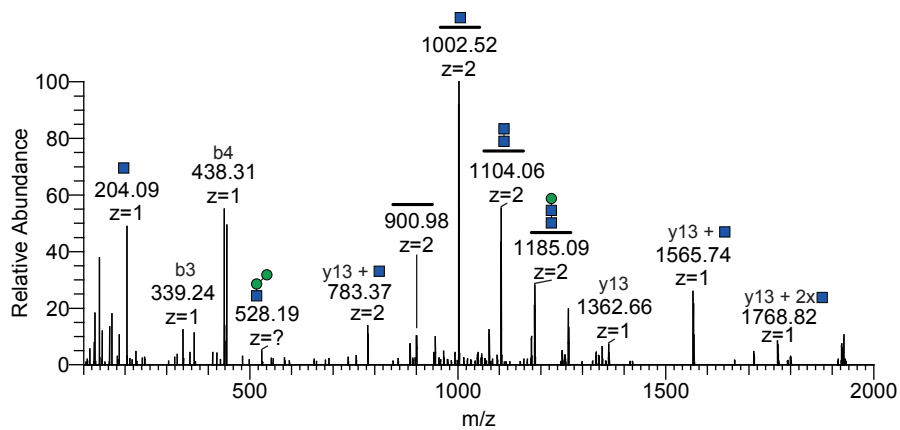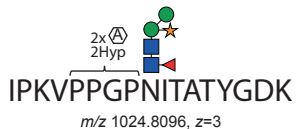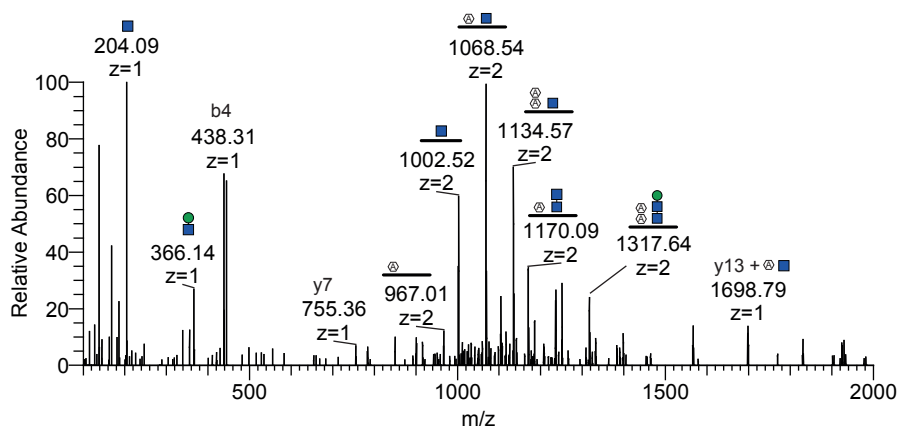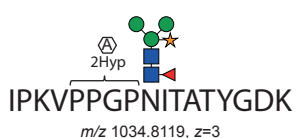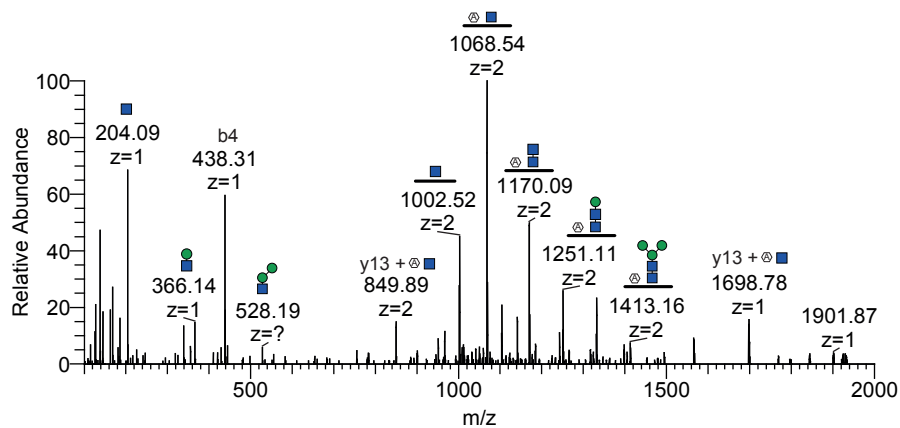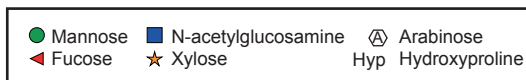

# Supplemental figure 4.

Annotated HCD-MS2 spectra of Phl p 1 N-glycopeptides identified in this study.

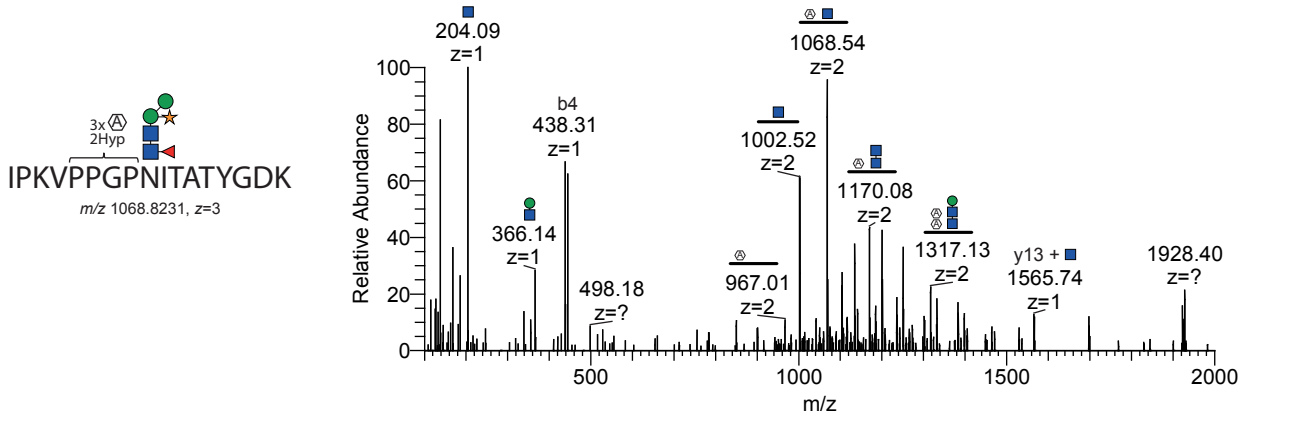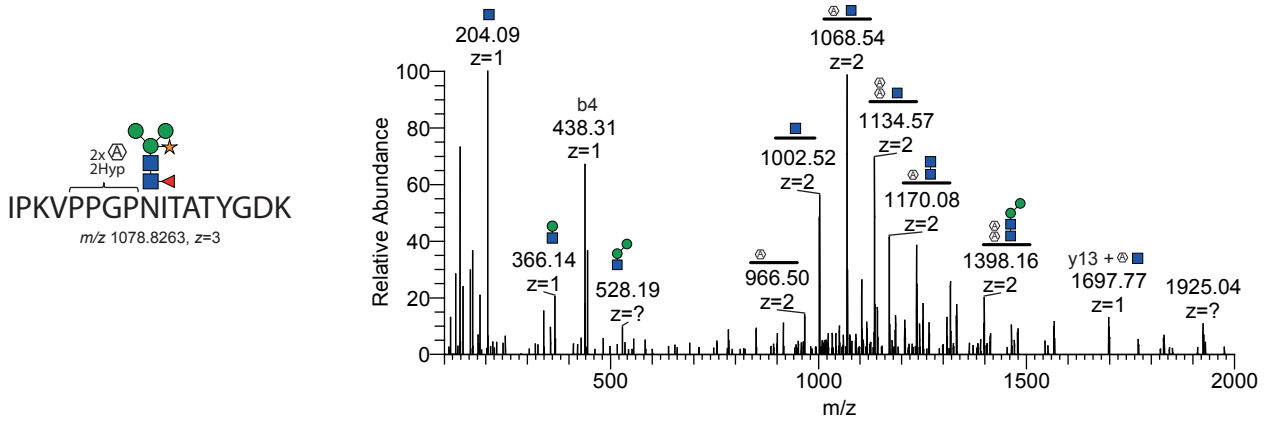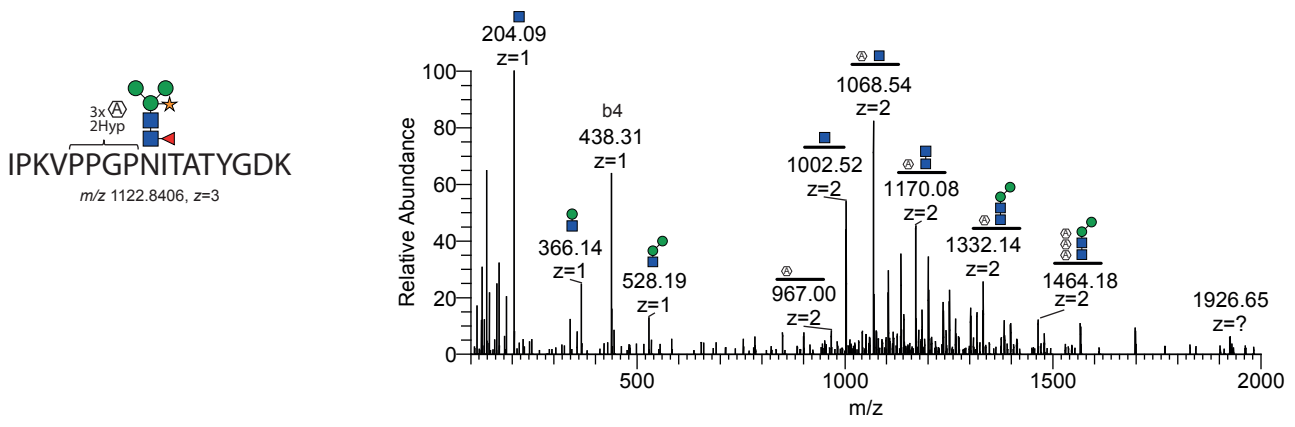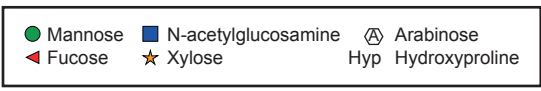

## Supplemental figure 4B.

Annotated HCD-MS2 spectra of Phl p 1 N-glycopeptide V<sup>27</sup>PPGPNTATYGDK<sup>40</sup> (boxed) modified by a single Hyp. The y<sub>10</sub>+HexNAc fragment at m/z 1289.61 demonstrates that P<sup>31</sup> is the hydroxylated residue (indicated as p).

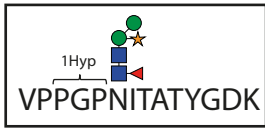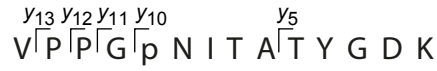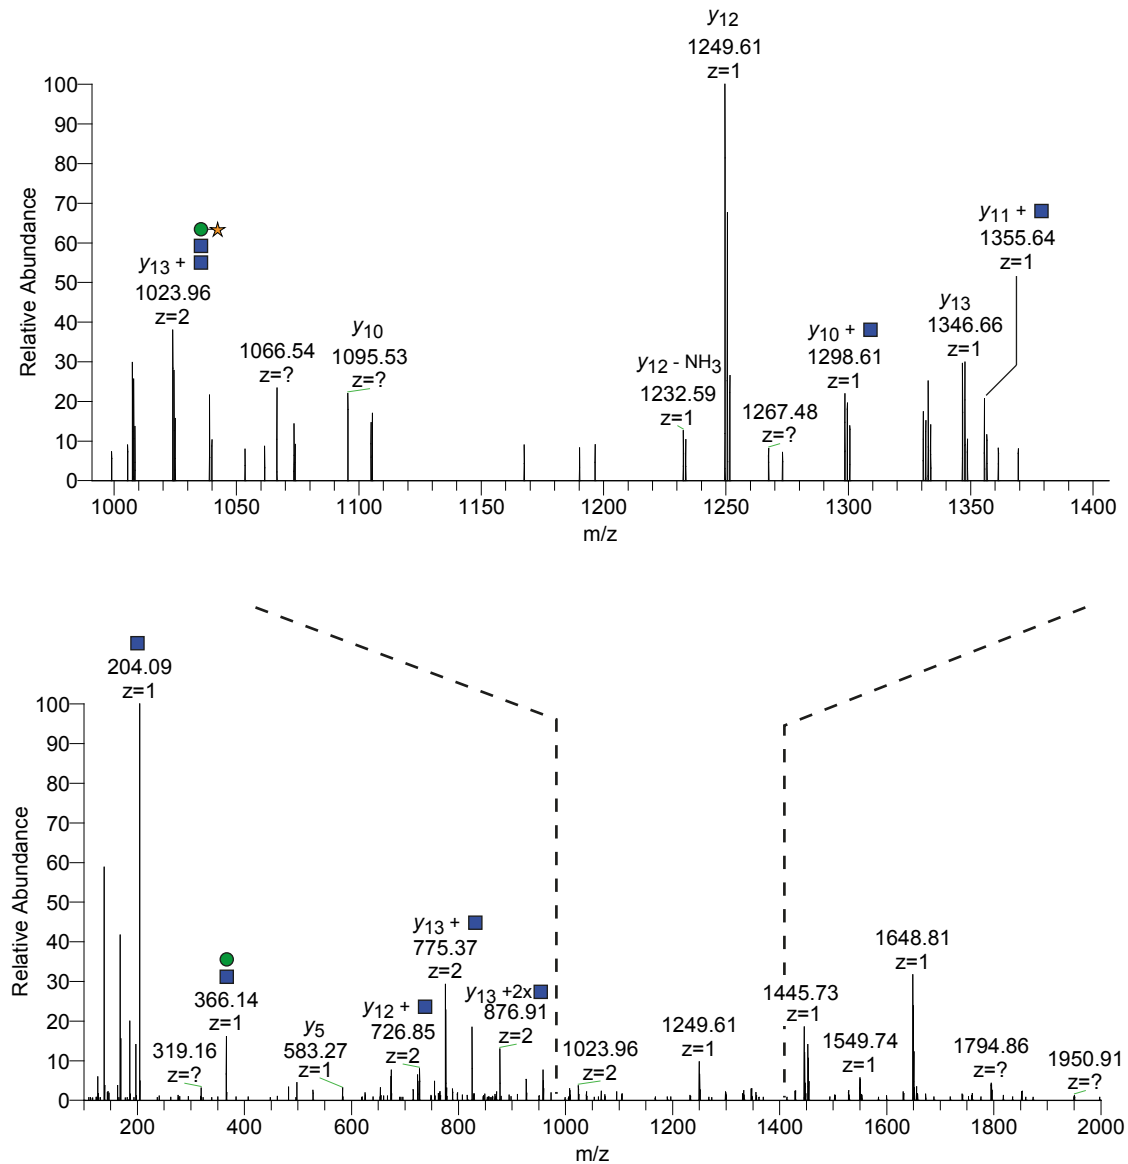

### Supplemental figure 4C.

Annotated HCD-MS2 spectra of Phl p 1 N-glycopeptide I<sup>24</sup>PKVPPGP<sup>31</sup>NITATYGDK<sup>40</sup> (boxed) modified by two Hyp residues. The y<sub>10</sub>+HexNAc fragment at m/z 1289.61 demonstrates that P<sup>31</sup> is hydroxylated. The b<sub>3</sub> (m/z 339.24) and b<sub>5</sub> (m/z 551.36) fragments demonstrate that the second hydroxylation is on P<sup>28</sup> residue (indicated as p).

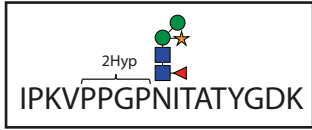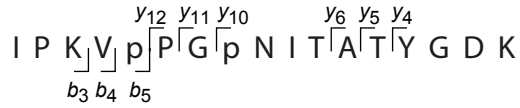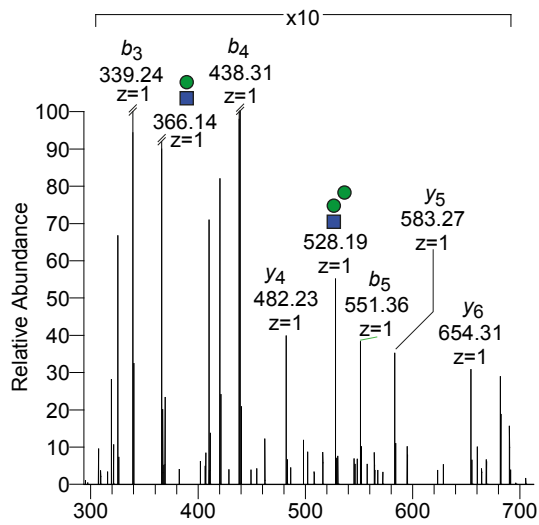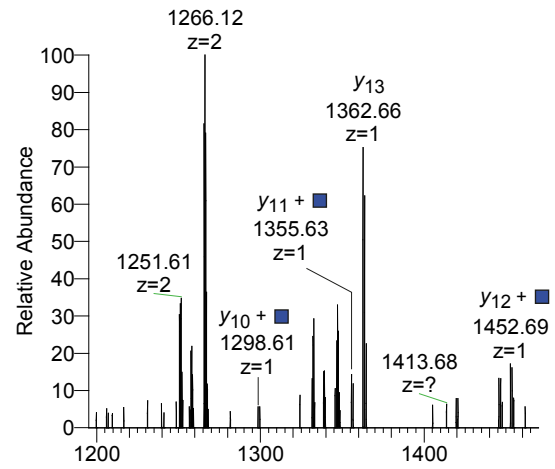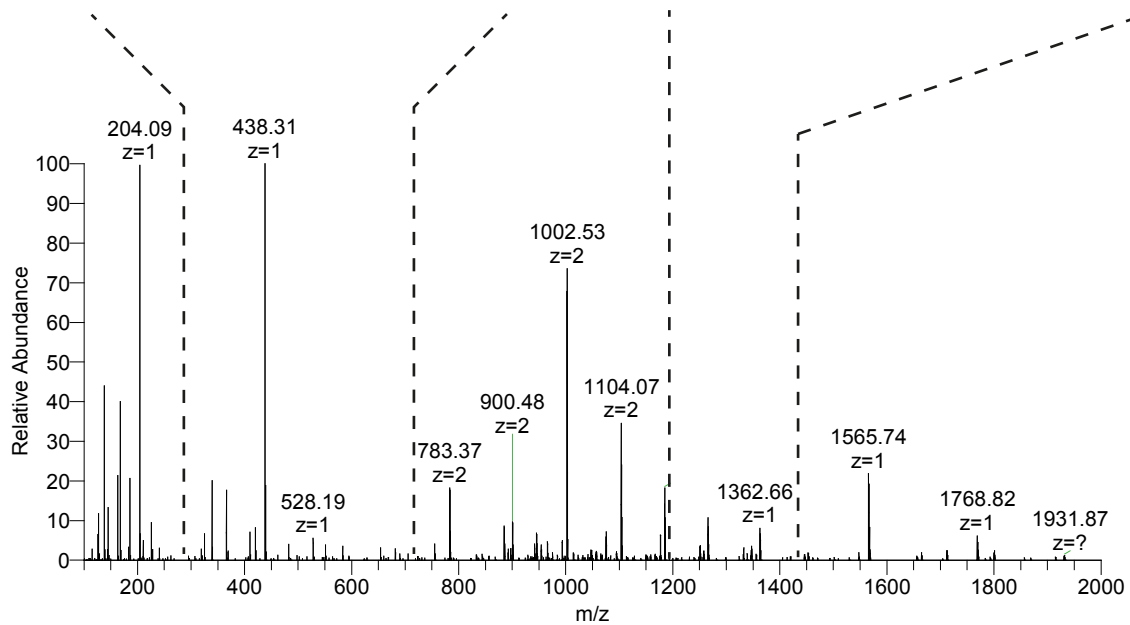



### Supplemental figure 5.

LC-ESI-MS of bariumhydroxide mediated hydrolysates of Phl p 1, Phl p 5 and an extensin enriched fraction of wild type *Arabidopsis thaliana* roots. A-C: Extracted ion traces of  $[M+H/Na]^+$  ( $m/z$  264 (Hyp-Araf1), 396 (Hyp-Araf2), 528/550 (Hyp-Araf3) and 660/682 (Hyp-Araf4)) of an extensin enriched fraction derived from roots of *A. thaliana* (A), Phl p 5 (B) and Phl p 1 (C). Each of the Hyp-Araf $_n$  species elutes as two peaks due to the C-4 R/S stereo chemistry of Hyps. D-F: MS2 spectra of Phl p 1 derived Hyp-Araf1 (D), Hyp-Araf2 (E) and Hyp-Araf3 (F).

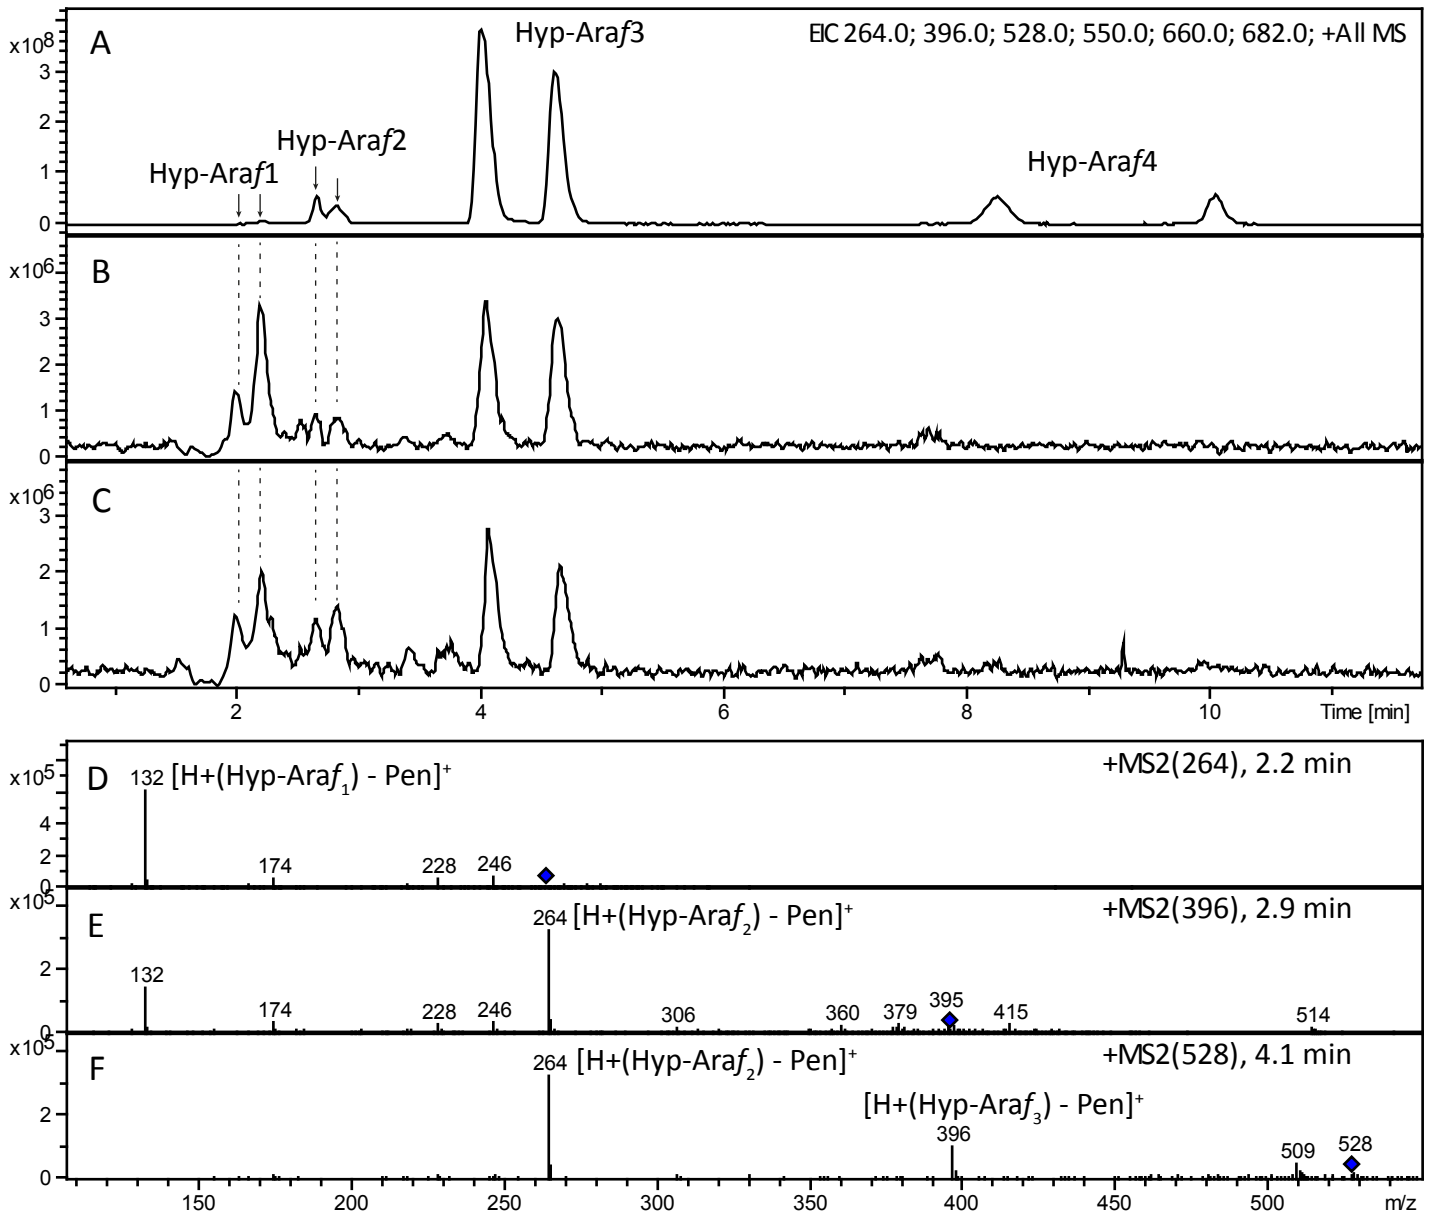

# Supplemental figure 6A

## Phi p 5

HCD-MS2 of the A<sup>26</sup>DLGYGPATPAAPAAGYTPATPAAPAEAAPAGK<sup>58</sup> peptide modified by 7 Hyp residues. Hyp residues are indicated as *p*.

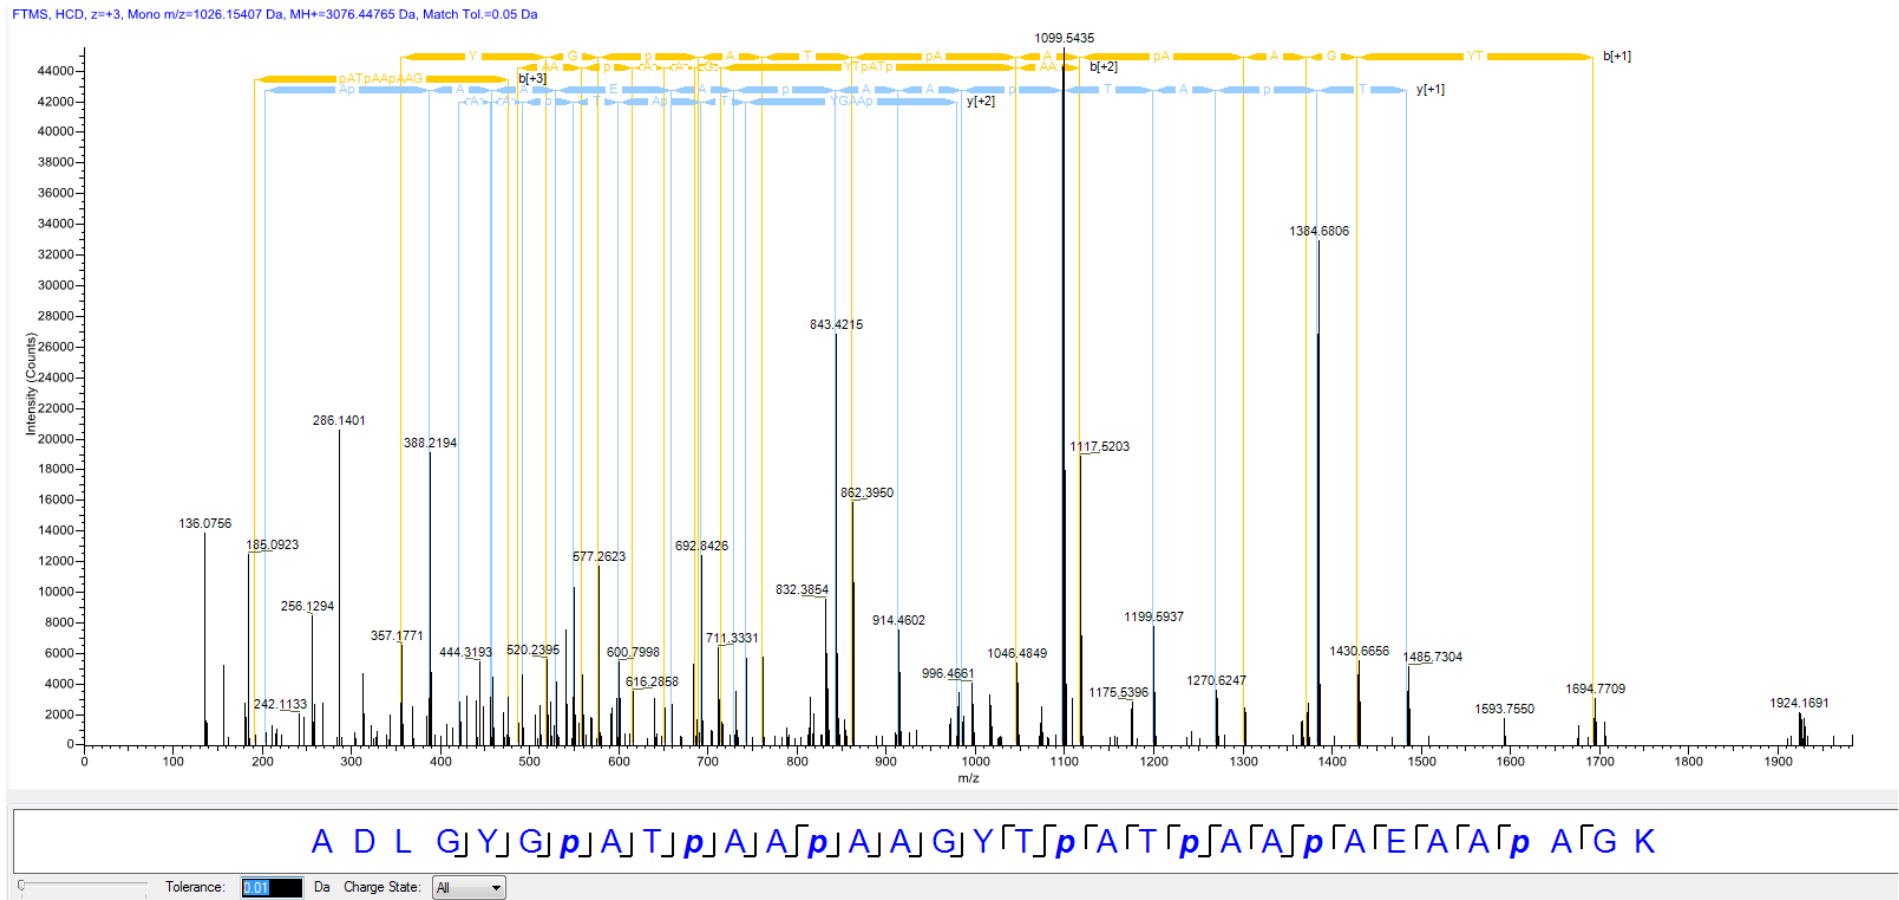

# Supplemental figure 6B

## PhI p 5

HCD-MS2 of the A<sup>26</sup>DLGYGPATPAAPAAGYTPATPAAPAEAPAGK<sup>58</sup> peptide modified by 7 Hyp residues and 2 Pen sugars. The Pen modified Hyp residues have not been determined. Hyp residues are indicated as *p*.

FTMS, HCD, z=+3, Mono m/z=1114.17688 Da, MH+=3340.51609 Da, Match Tol.=0.05 Da

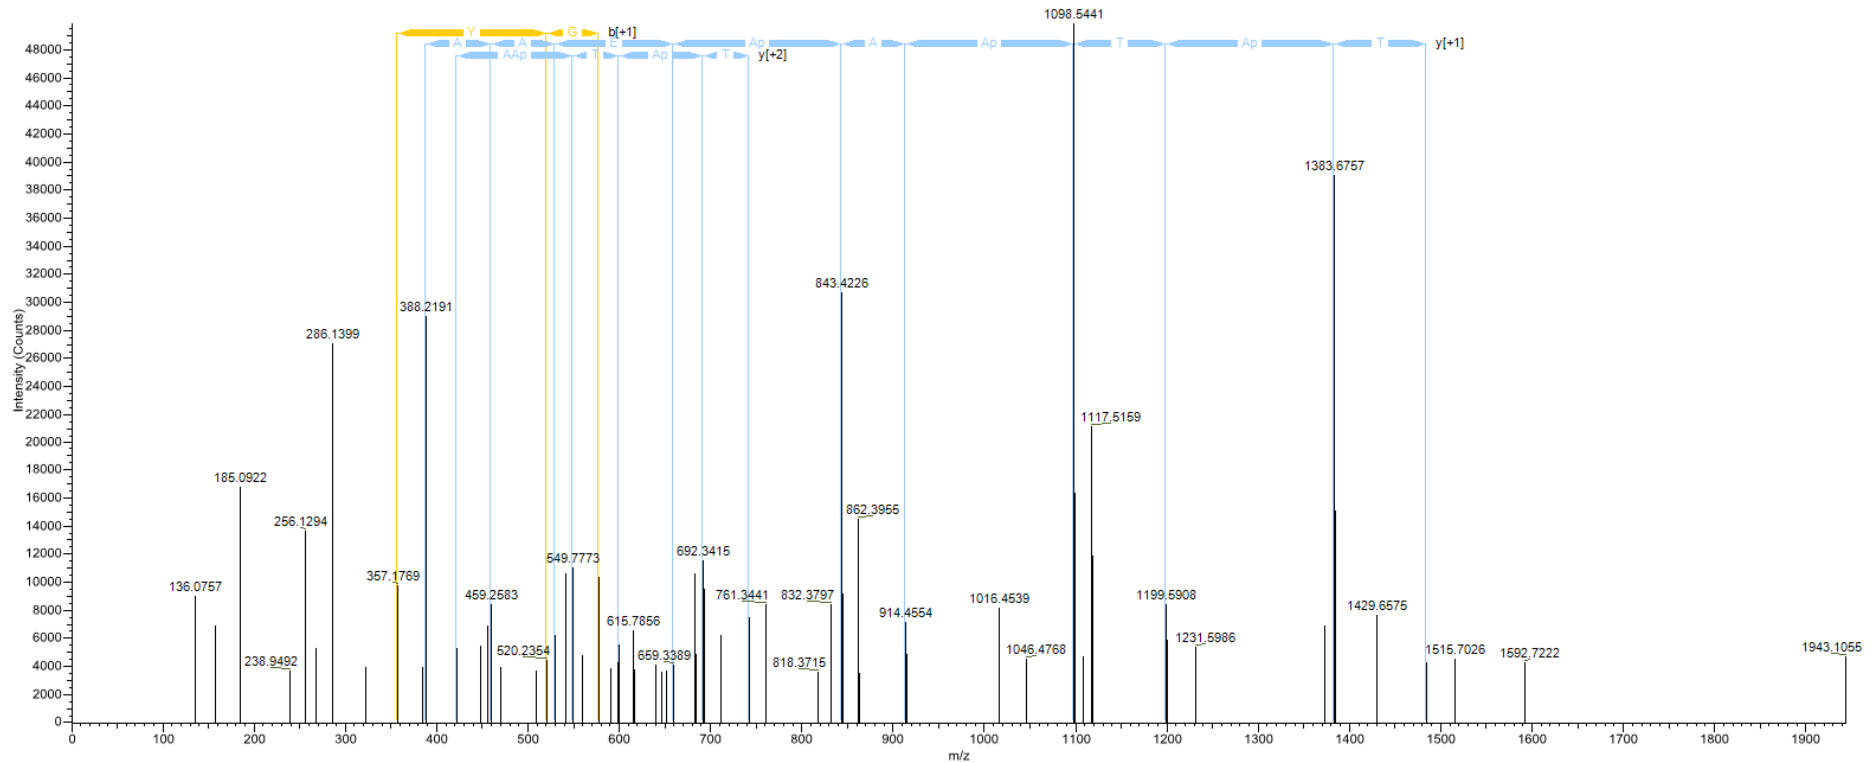

A D L G ] Y ] G ] p A T p A A p [ A A G Y ] T [ p A ] T [ p A [ A [ p A [ E [ A [ A [ p A ] G K

Tolerance: 0.01 Da Charge State: All

# Supplemental figure 6C

## PhI p 5

HCD-MS2 of the A<sup>20</sup>DAGYAPATPAAAGAAAGK<sup>38</sup> peptide modified by 2 Hyp residues (indicated as *p*).

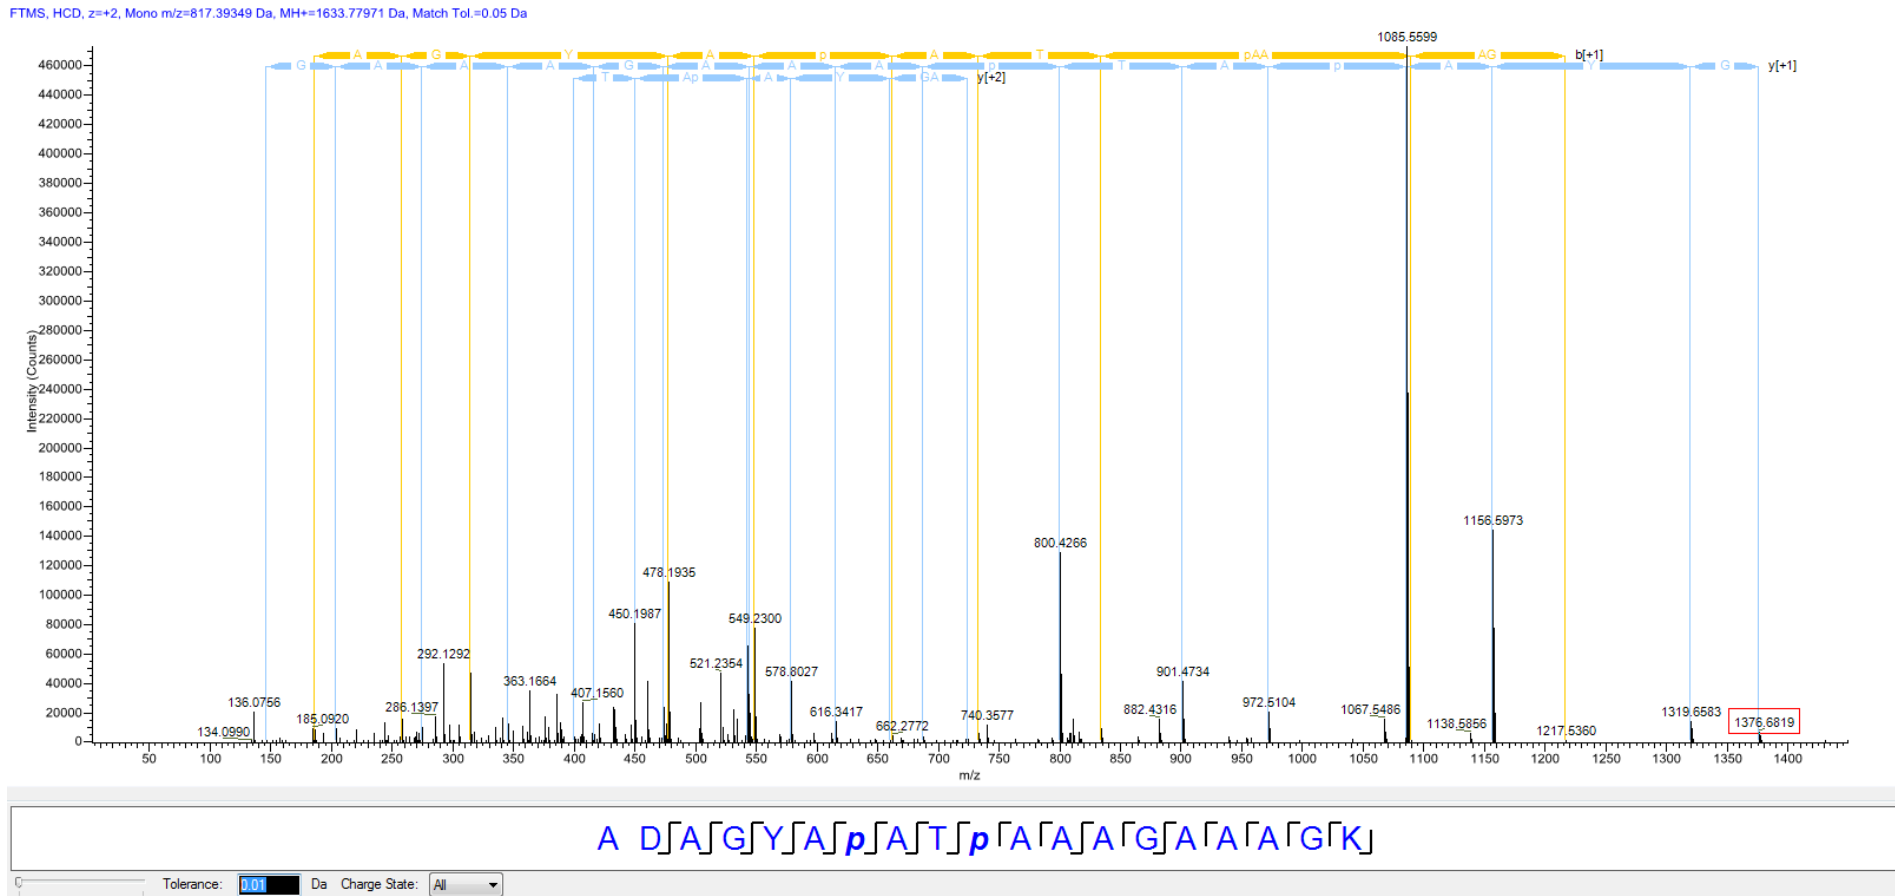

# Supplemental figure 6D

## Phl p 5

HCD-MS2 of the A<sup>20</sup>DAGYAPATPAAAGAAAGK<sup>38</sup> peptide modified by 2 Hyp residues (indicated as *p*) and one Pen sugar (site not determined).

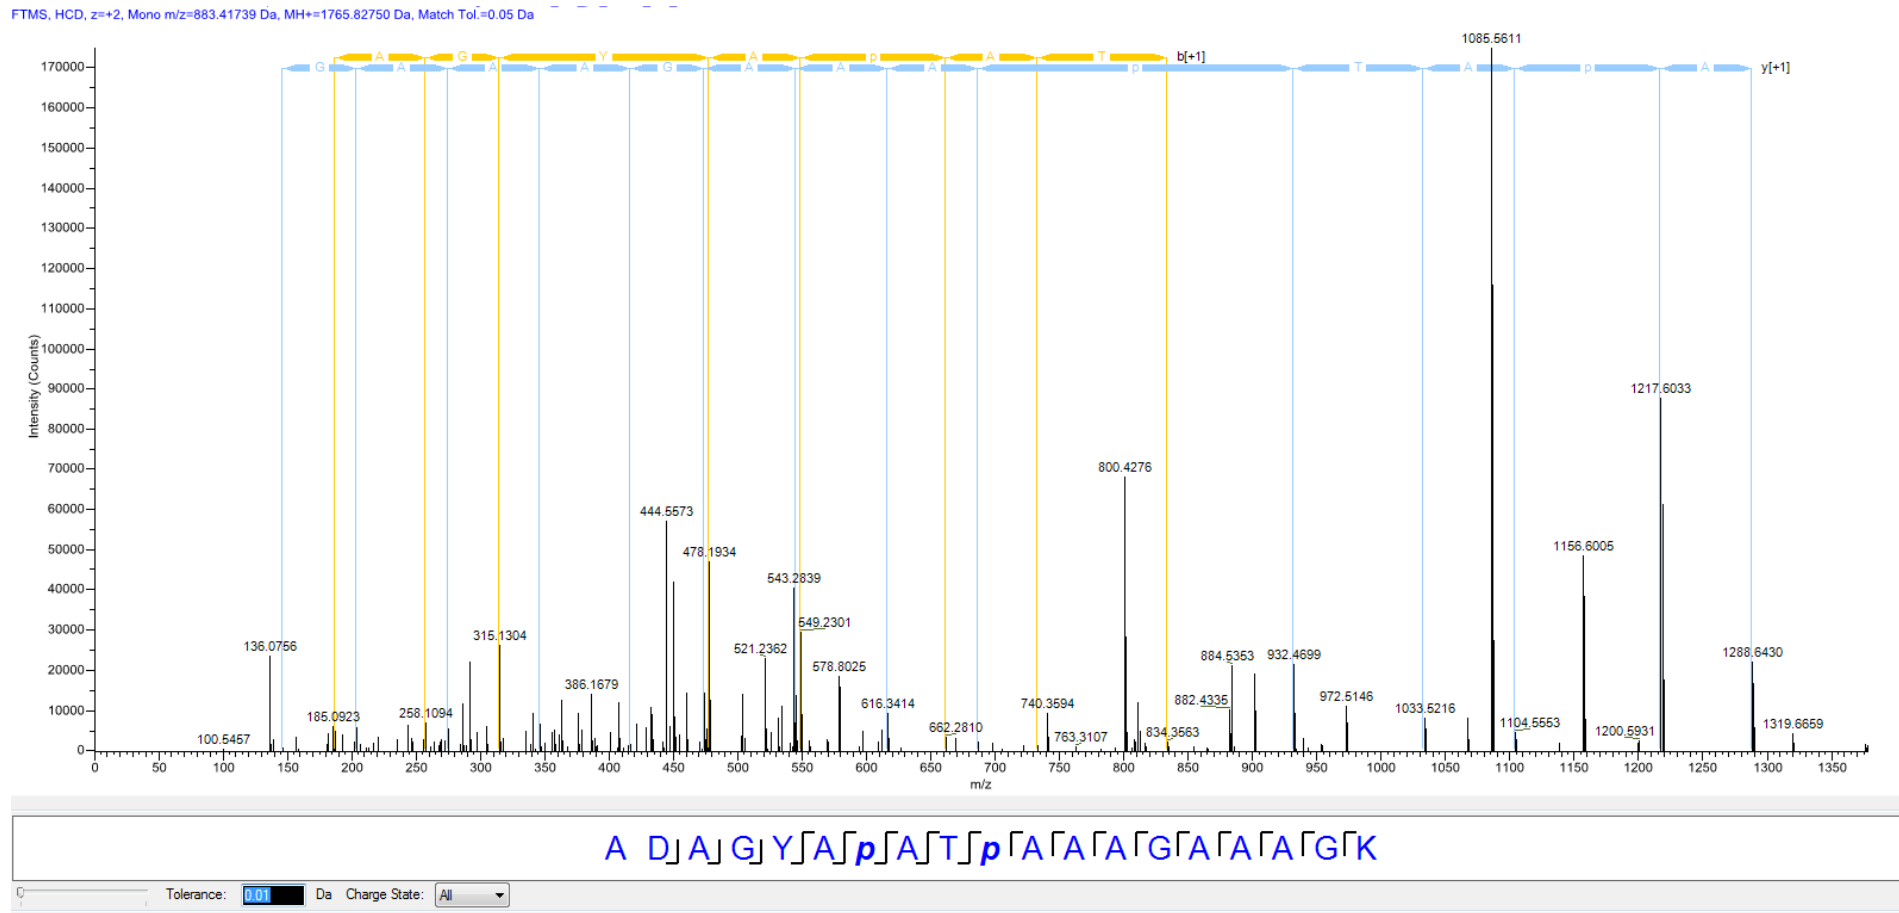

# Supplemental figure 6E

## Phi p 5

ETD-MS2 of the A<sup>20</sup>DAGYAPATPAAAGAAAGK<sup>38</sup> peptide modified by 2 Hyp residues (indicated as *p*) and one Pen sugar (site mapped to Hyp<sup>10</sup> on the peptide sequence).

FTMS, ETD, z=+2, Mono m/z=883.41321 Da, MH+=1765.81914 Da, Match Tol.=0.05 Da

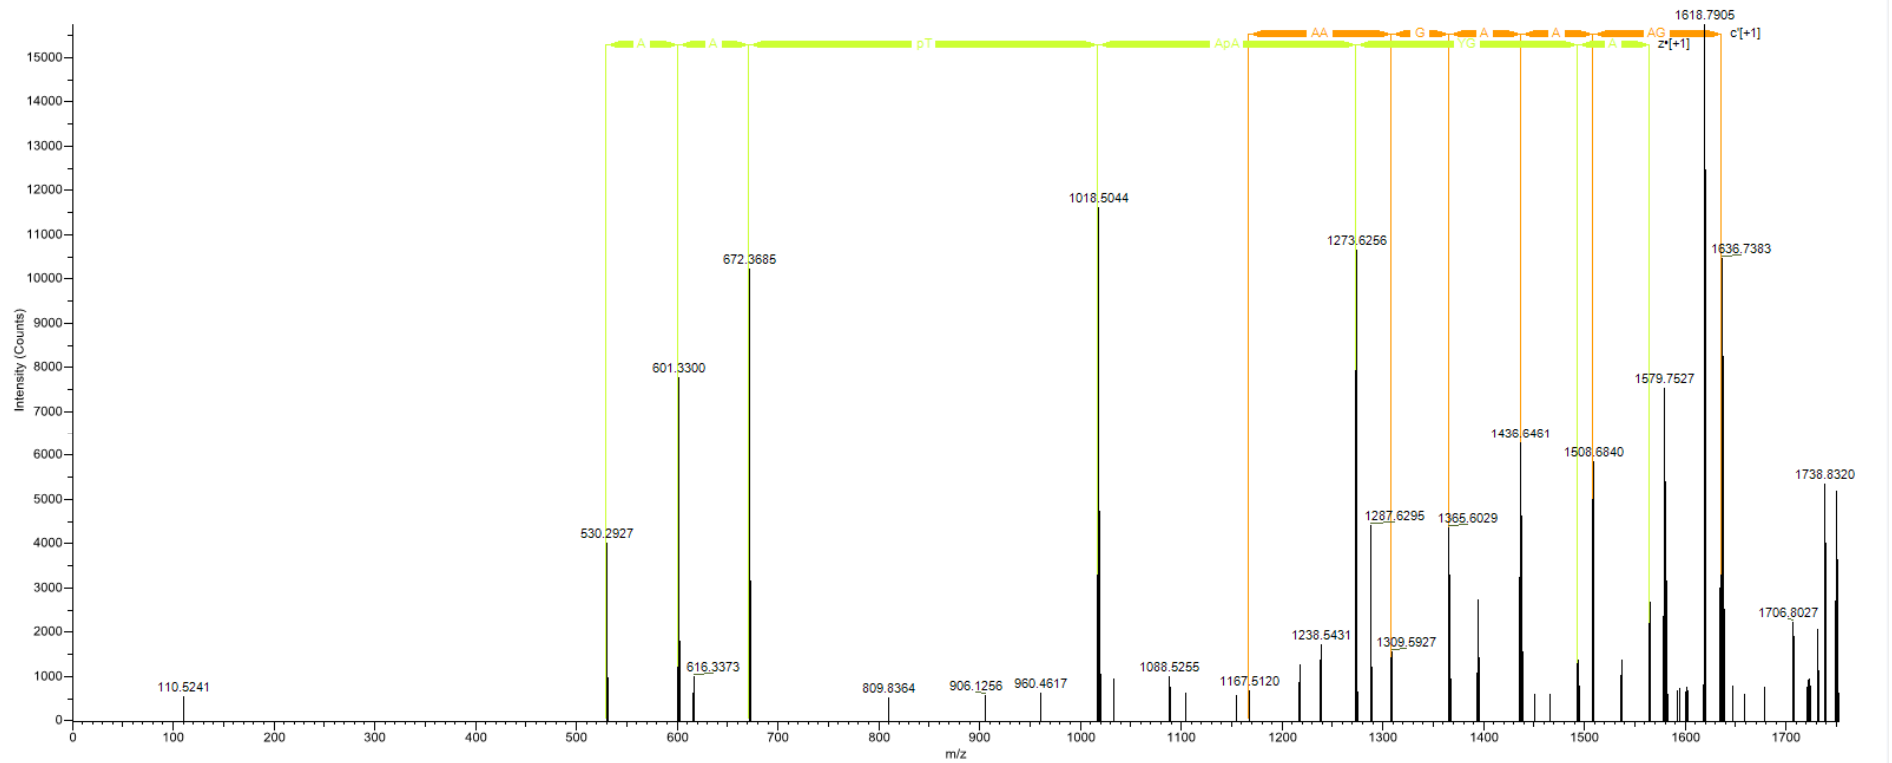

A D A G Y A p A T p A A A G A A A G K

Tolerance: 0.01 Da Charge State: All

## Supplemental figure 7.

(A) N-terminal peptide of Phl p 5 identified with 6 Hyp and up to 7 pentose residues.

Full MS1 spectra have been deconvoluted into their monoisotopic  $[M+H]^+$  masses by the Xtract tool.

HCD-MS2 fragmentation of the precursor ion at  $m/z$  3442.56 and  $m/z$  3046.43, corresponding to the

$A^{26}DLGYGPATPAAPAAGYTPATPAAPAGAEPAGK^{58}$  peptide modified by 7Hyp;Pen3 (B) and 7Hyp (C).

Hyp residues are indicated as p. The b- and y-ion fragments verify the peptide identity.

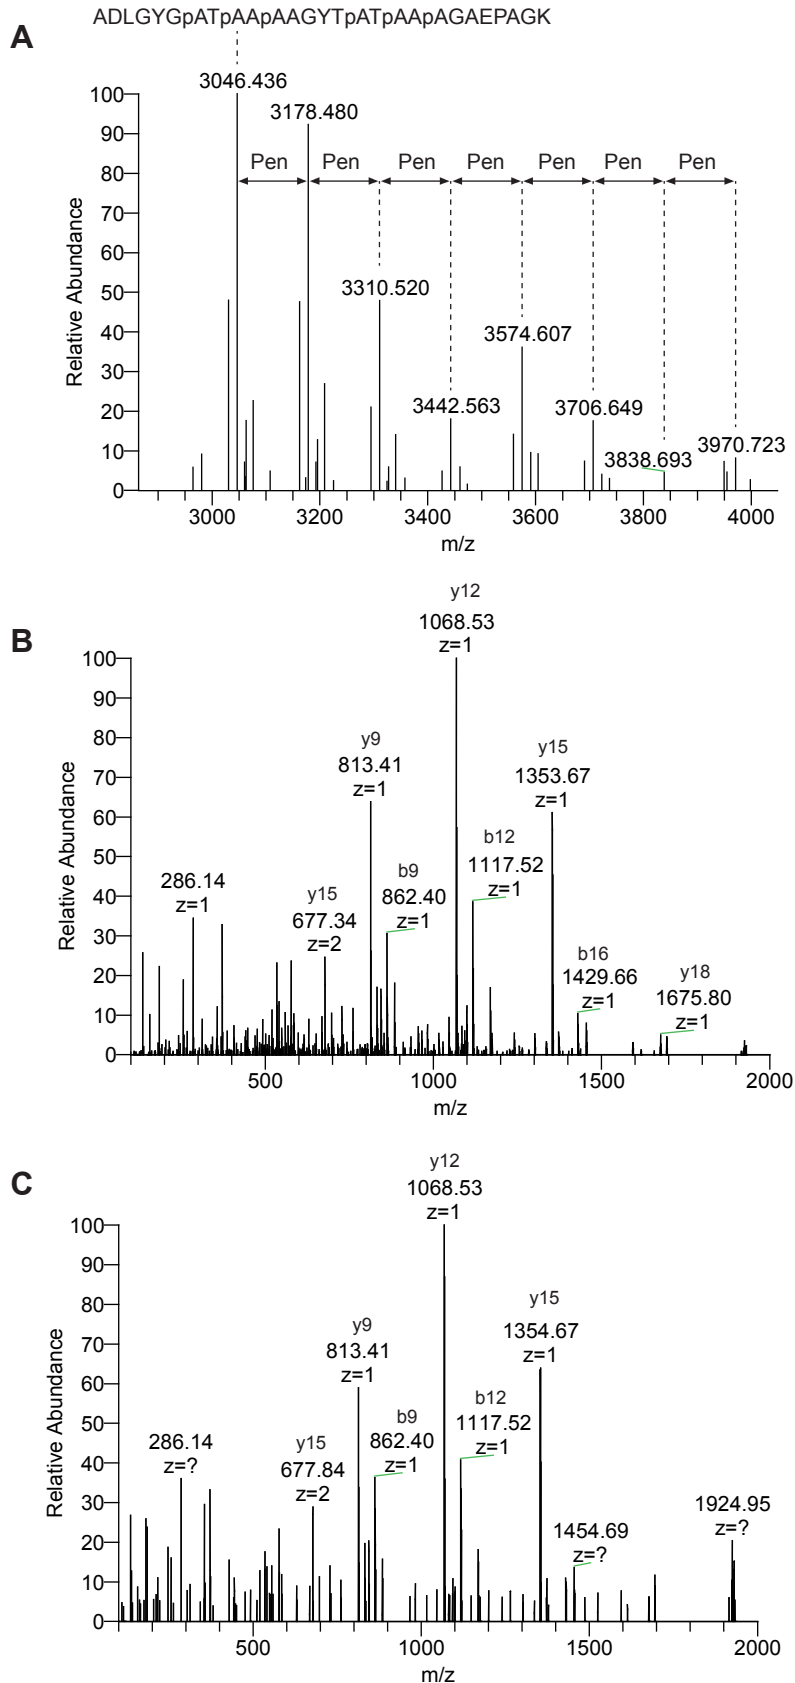

# Supplemental figure 8A

## Der p 2

HCD-MS2 of the G<sup>49</sup>KPFQLEAVFEANQNTKTAK<sup>68</sup> peptide modified by a single Hex on Lys (indicated as *k*).

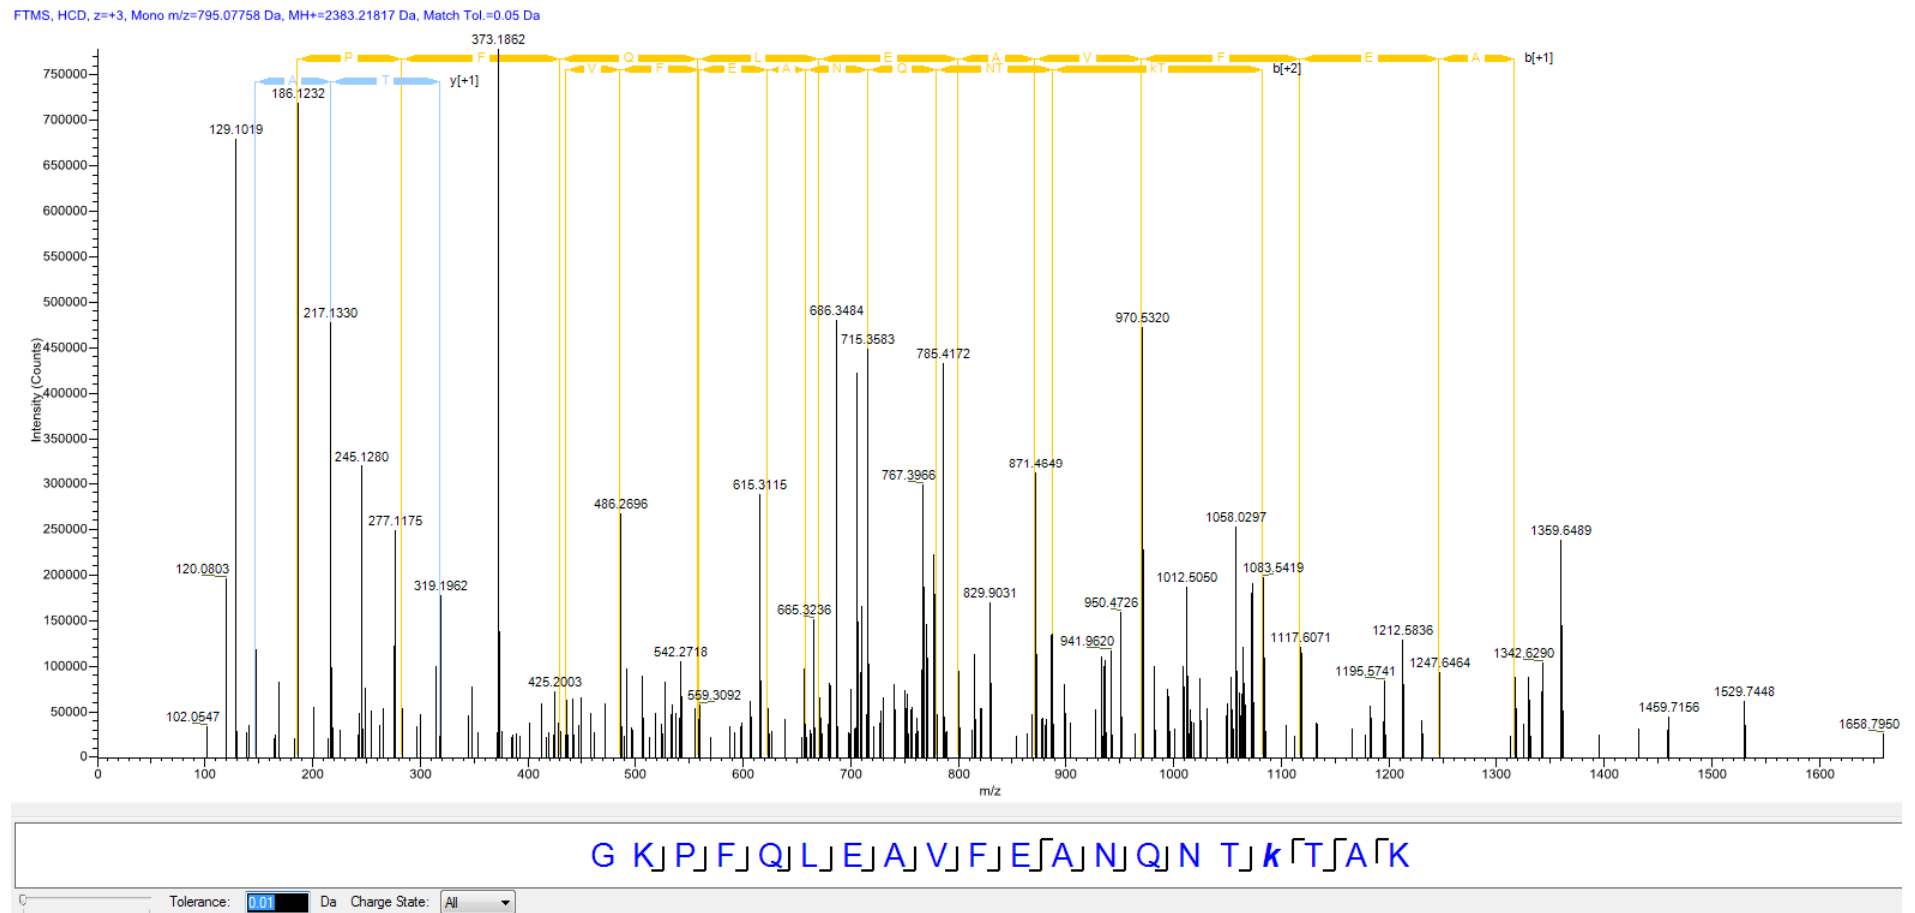



# Supplemental figure 8B

## Der p 2

HCD-MS2 of the G<sup>49</sup>KPFQLEAVFEANQNTKTAK<sup>68</sup> peptide modified by a two Hex on Lys. The site or glycan heterogeneity has not been determined.

FTMS, HCD, z=+3, Mono m/z=849.08862 Da, MH+=2545.25132 Da, Match Tol.=0.05 Da

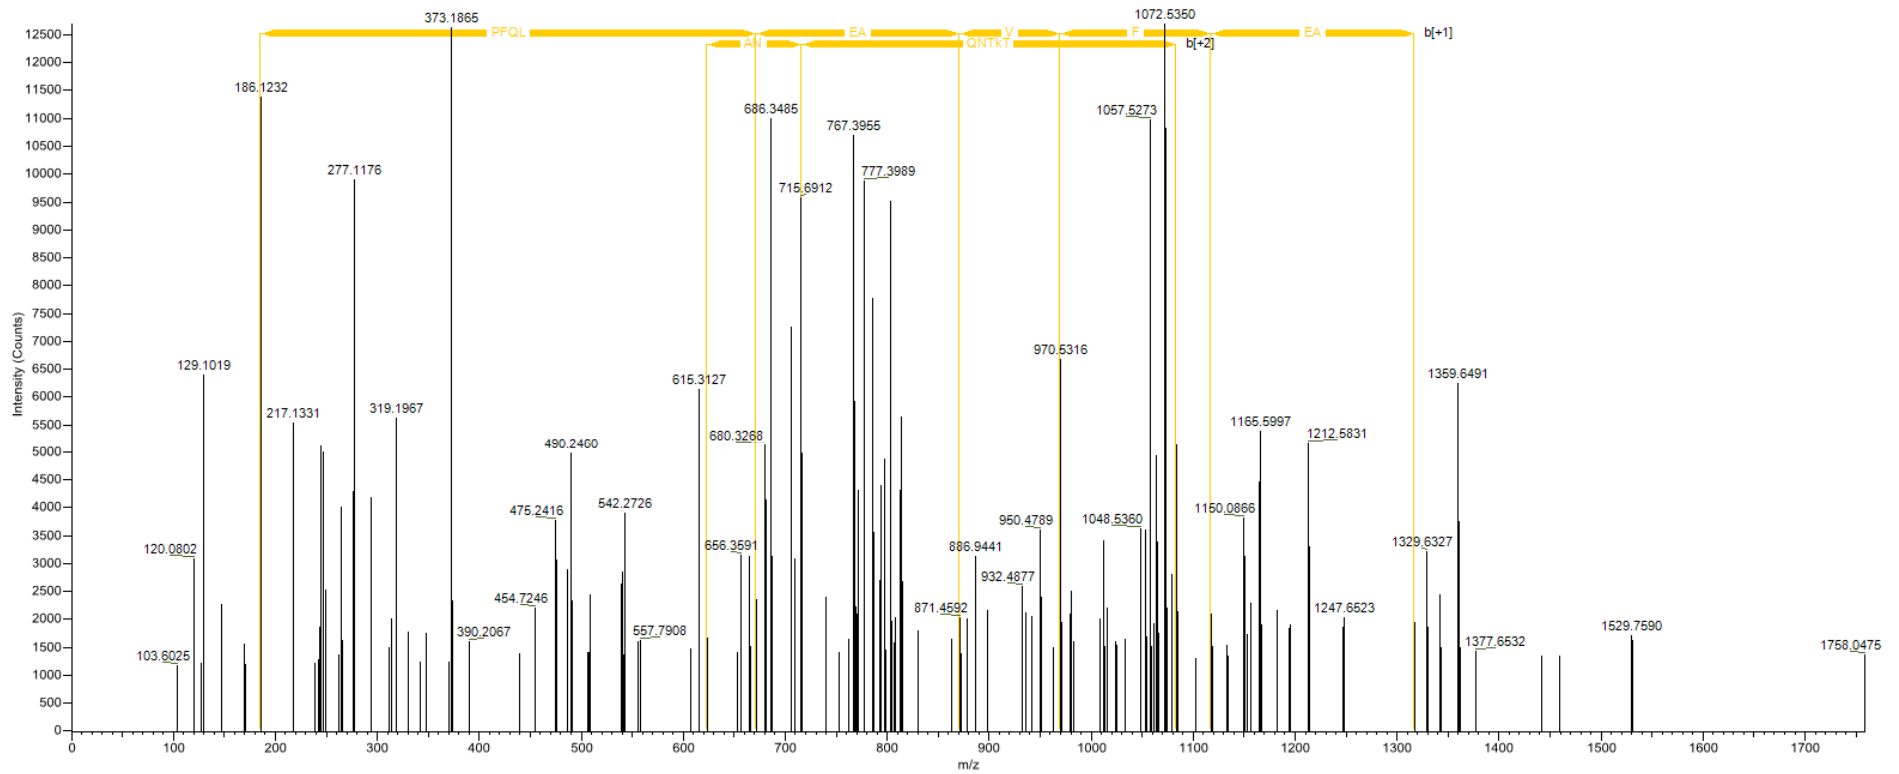

G K ] P F Q L ] E A ] V F ] E ] A ] N ] Q N T [ k T ] A k

Tolerance: 0.01 Da Charge State: All

# Supplemental figure 8C

## Der p 2

ETD-MS2 of the G<sup>100</sup>QQYDIKYTWNVPK<sup>113</sup> peptide modified by a single Hex on Lys (indicated as *k*).

FTMS, ETD, z=+3, Mono m/z=634.64941 Da, MH+=1901.93369 Da, Match Tol.=0.05 Da

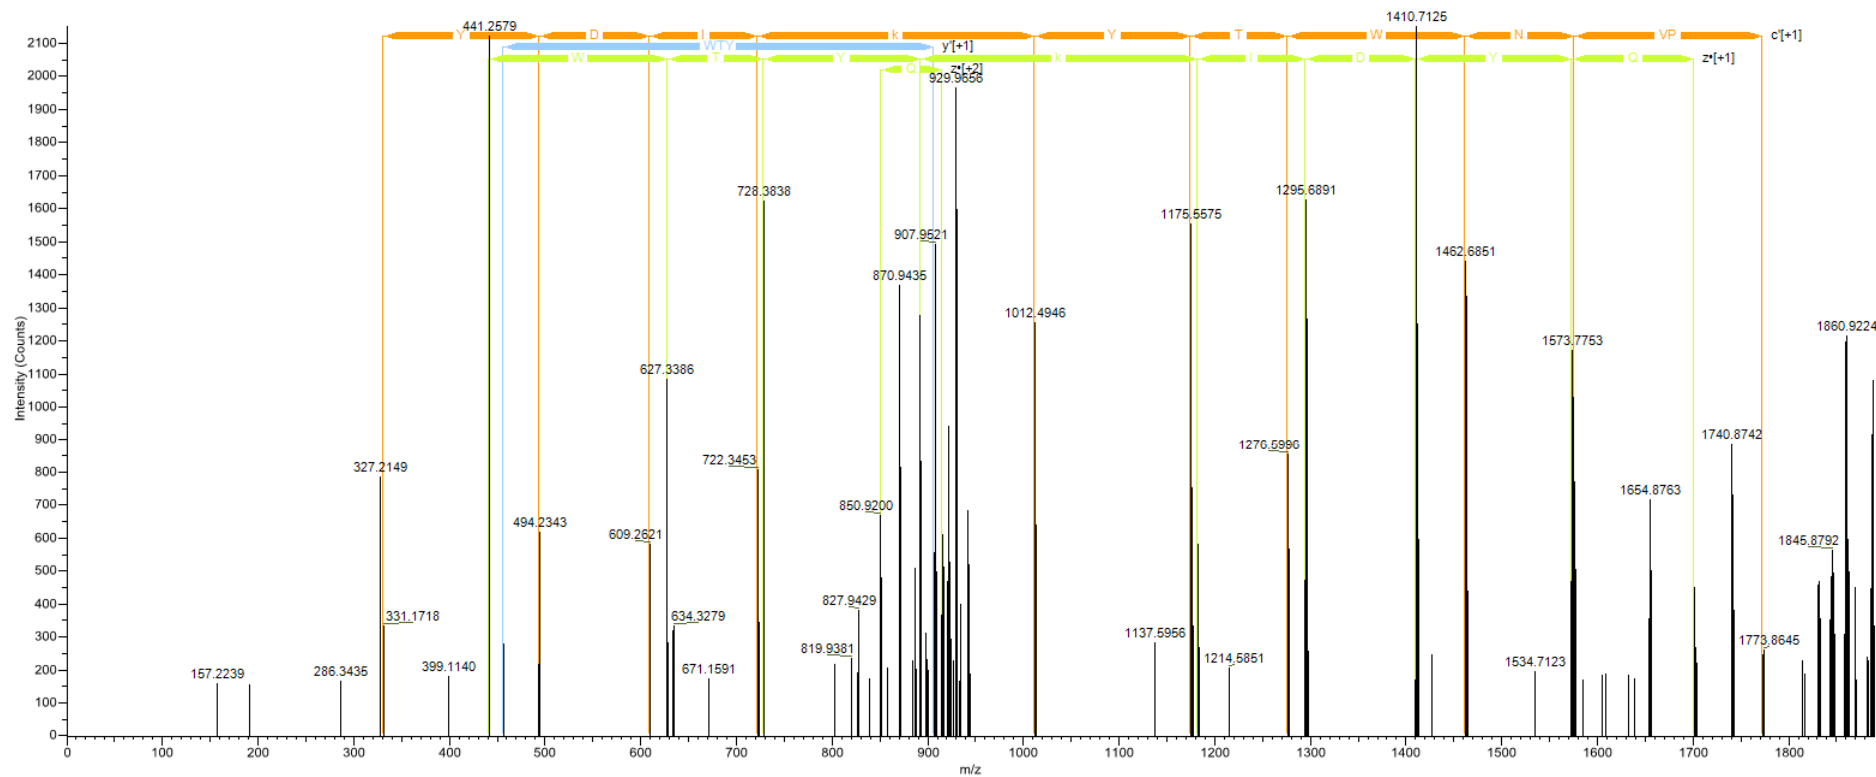

G<sup>100</sup>Q<sup>101</sup>Q<sup>102</sup>Y<sup>103</sup>D<sup>104</sup>I<sup>105</sup>Y<sup>106</sup>k<sup>107</sup>Y<sup>108</sup>T<sup>109</sup>W<sup>110</sup>N<sup>111</sup>V<sup>112</sup>P<sup>113</sup>K<sup>114</sup>

Tolerance: 0.01 Da Charge State: All

# Supplemental figure 8D

## Der p 2

ETD-MS2 of the I<sup>114</sup>APKSENVVTVK<sup>126</sup> peptide modified by a single Hex on Lys (indicated as *k*).

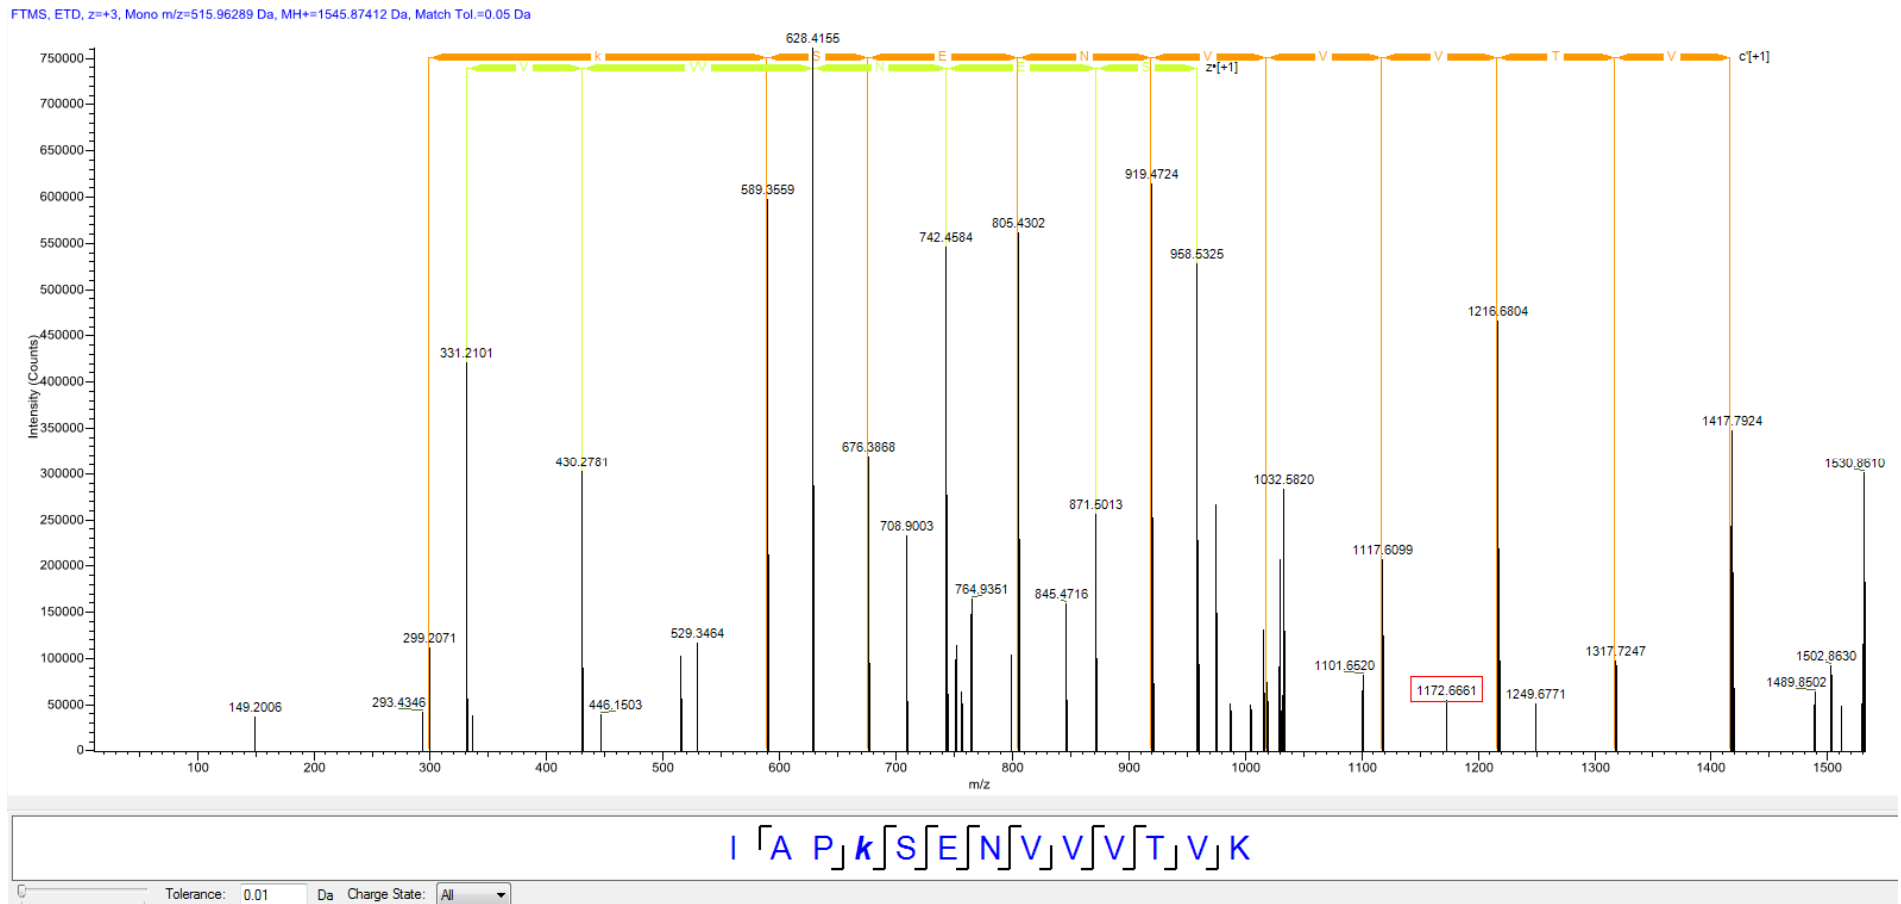

# Supplemental figure 9A

## Der f 2

ETD-MS2 of the C<sup>95</sup>PLVKGQQYDIK<sup>106</sup> peptide modified by a single Hex on Lys (indicated as *k*).

FTMS, ETD, z=+3, Mono m/z=537.60779 Da, MH+=1610.80881 Da, Match Tol.=0.05 Da

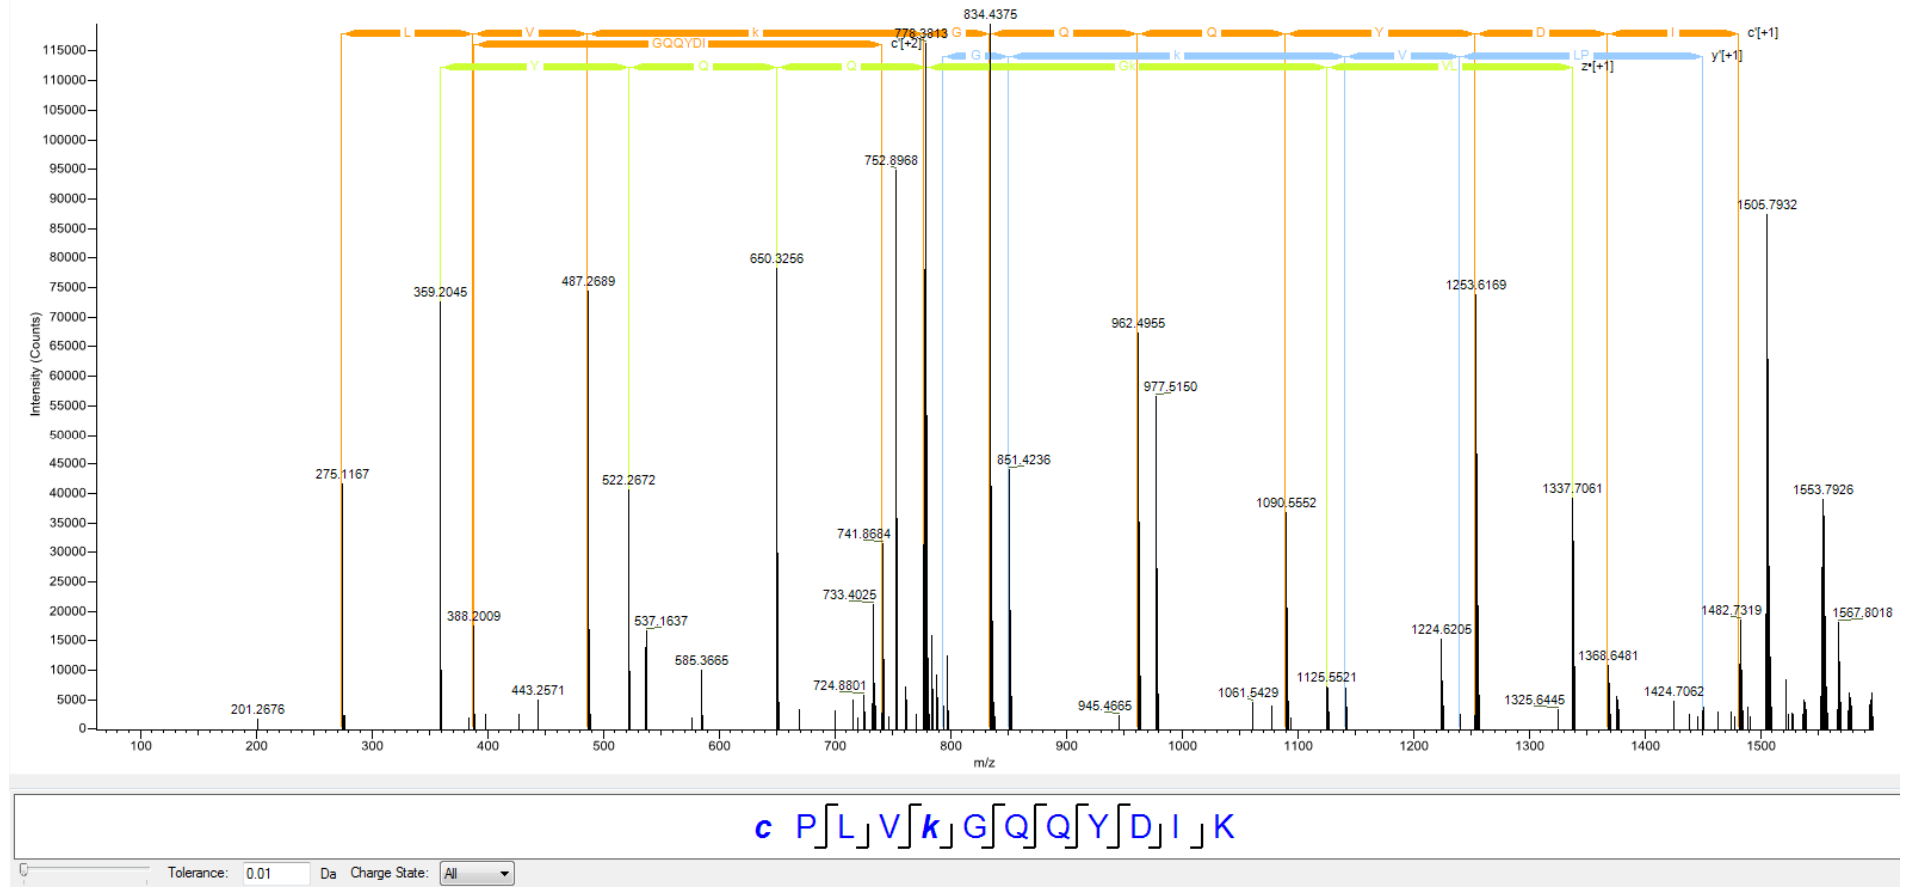

# Supplemental figure 9B

## Der f 2

ETD-MS2 of the G<sup>100</sup>QQYDIKWTWNPVK<sup>113</sup> peptide modified by a single Hex on Lys (indicated as *k*).

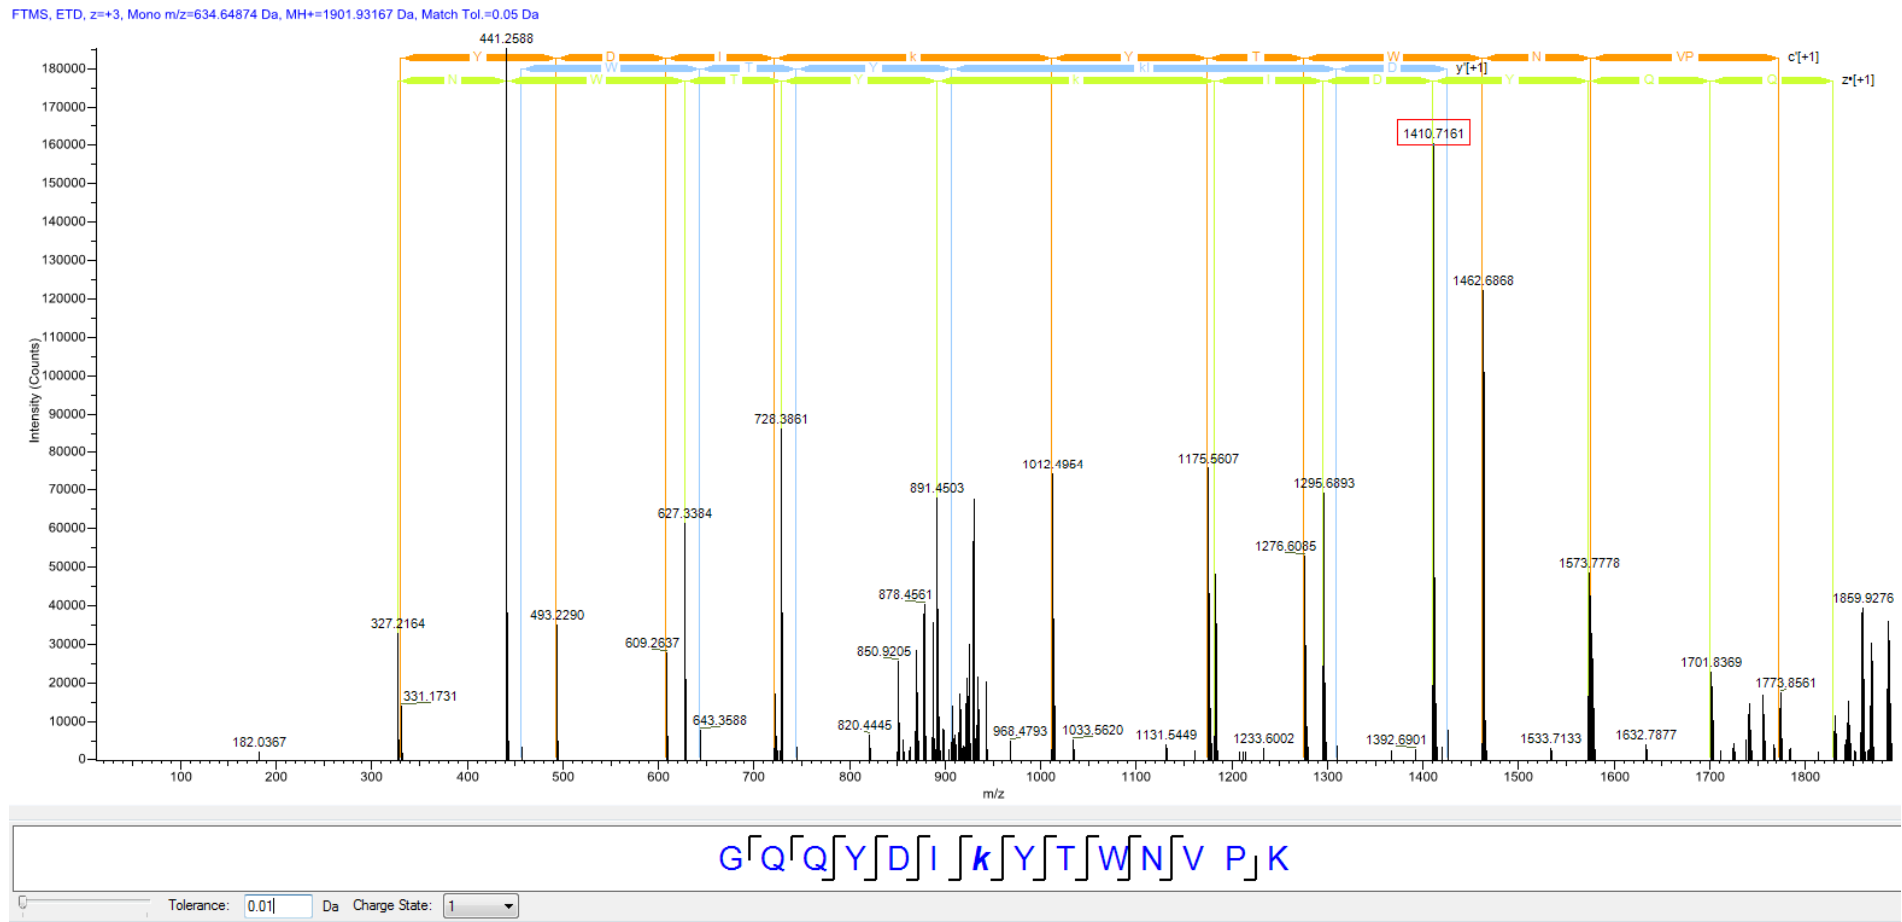

# Supplemental figure 9C

## Der f 2

ETD-MS2 of the I<sup>114</sup>APKSENVVTVK<sup>126</sup> peptide modified by a single Hex on Lys (indicated as *k*).

FTMS, ETD, z=+3, Mono m/z=515.96259 Da, MH+=1545.87320 Da, Match Tol.=0.05 Da

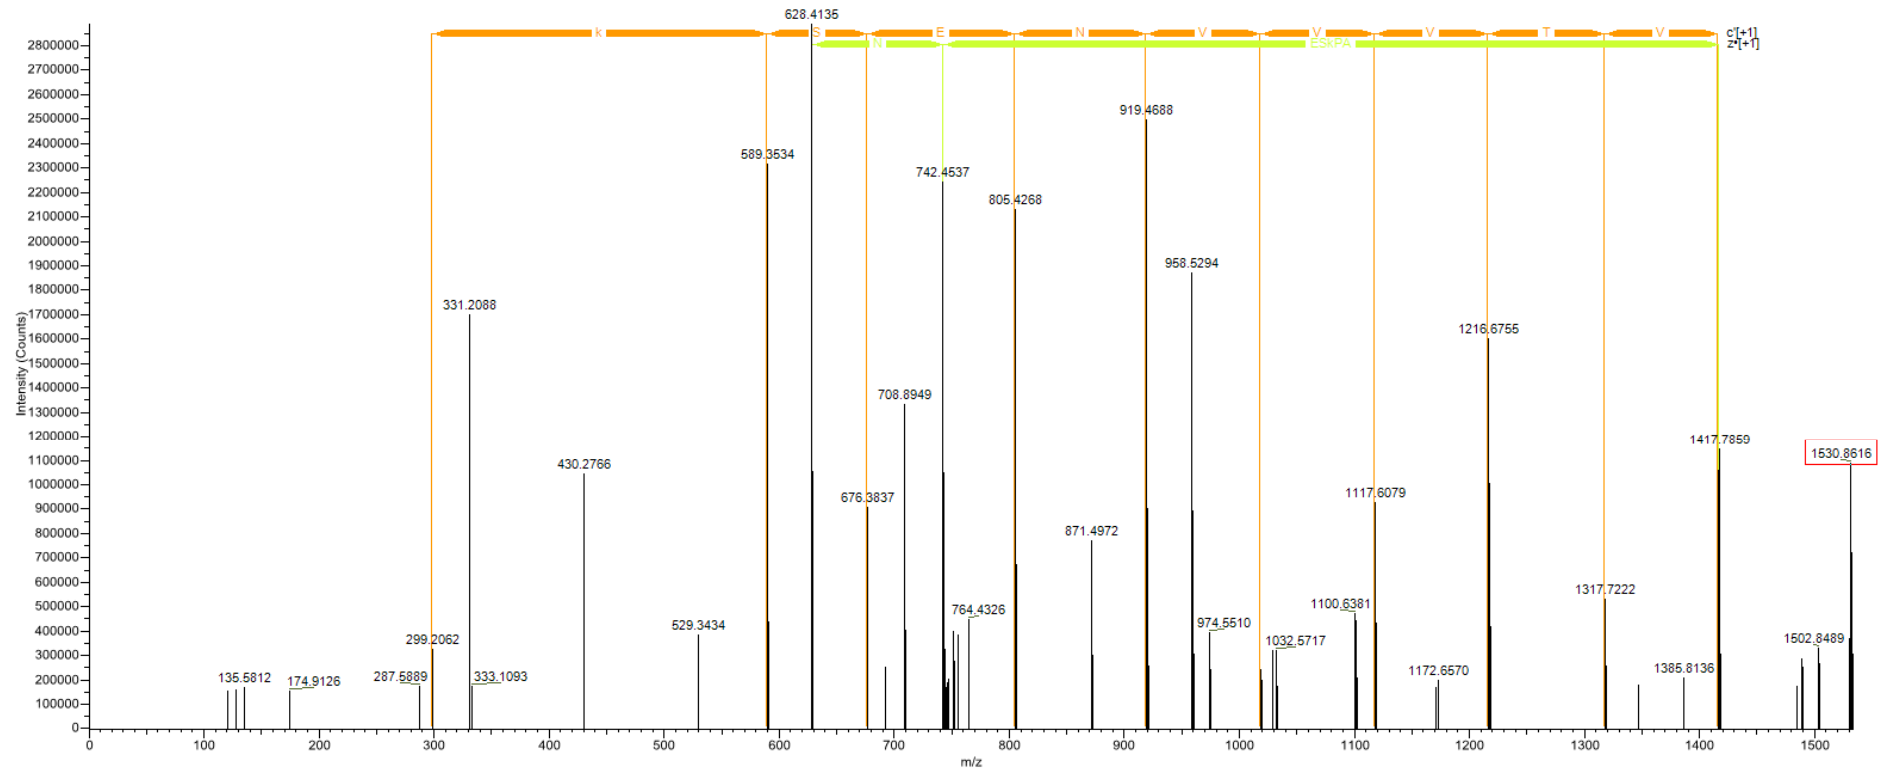

I A P k S E N V V V T V K

Tolerance: 0.01 Da Charge State: All

### Supplemental figure 10.

ELISA standard curve of biotinylated O-mannosylated peptide used to determine the carbohydrate content of Der p 2 and Der f 2. O-mannosylated peptide standard, Der p 2 and Der f 2 were specifically biotinylated on the hexose residue through periodate oxidation followed by aldehyde-hydrazide chemistry to incorporate the biotin. Amount (molar ratio) of Der p2 and Der f2 containing glycans was subsequently determined by ELISA.

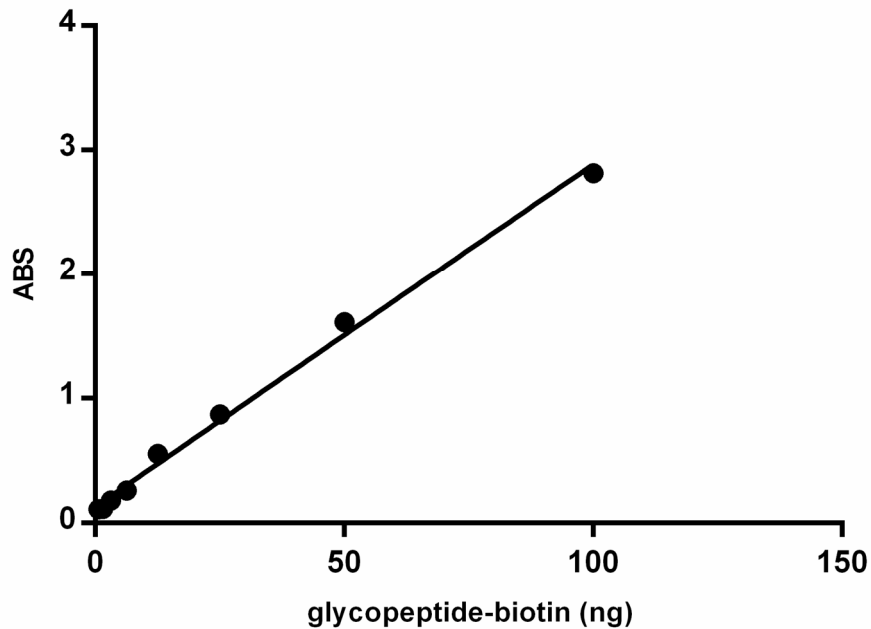

|             |     |
|-------------|-----|
| Der p2      | 34% |
| Der f2      | 42% |
| Neg control | 1%  |

## Supplemental figure 11.

Annotated HCD-MS2 spectrum of the tryptic NQSLDLAEQELVDCASQHGCHGDTIPR peptide of Der p 1 modified by 1 HexNAc. The b2 fragment annotation is incorrect. (B) ETD-MS2 of the same peptide mapping the HexNAc modification to N150. (C) HCD-MS2 spectrum of the same peptide modified by 2 HexNAc residues. The b2 fragment annotation is incorrect.

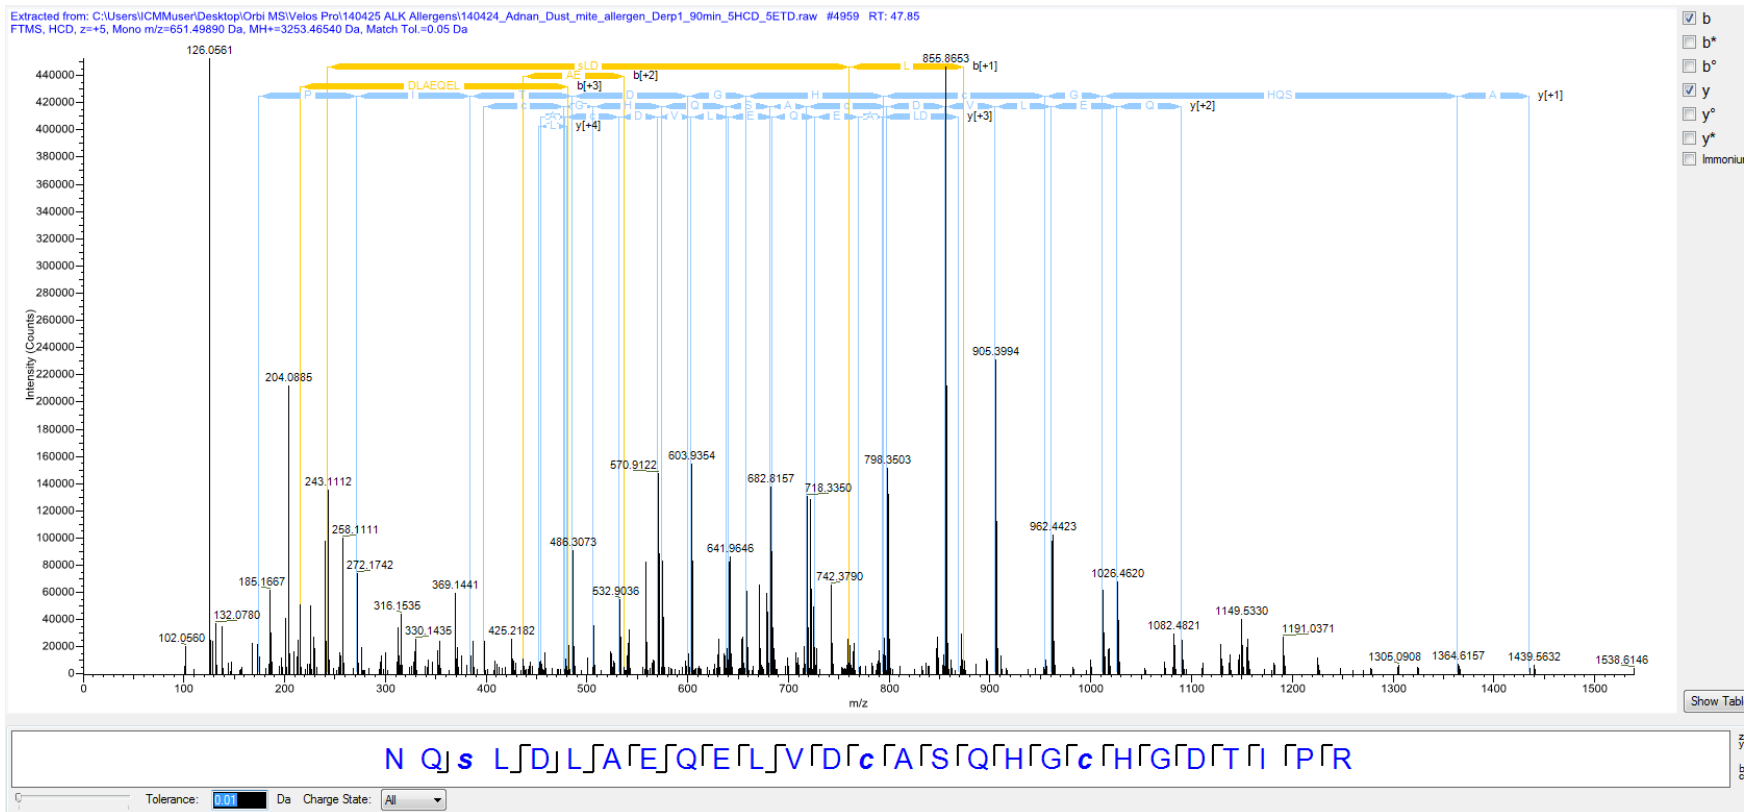

Supplemental figure 11A

Der p 1

N<sup>150</sup>QSLDLAEQELVDCASQHGCHGDTIPR<sup>176</sup> peptide + 1HexNAc

HCD-MS2



# Supplemental figure 11B

Der p 1

N<sup>150</sup>QSLDLAEQLVDCASQHGCHGDTIPR<sup>176</sup> peptide + 1HexNAc (Asn150)

ETD-MS2

Extracted from: C:\Users\ICMMuser\Desktop\Orbi MSI\Velos Pro140425 ALK Allergens\140424\_Adnan\_Dust\_mite\_allergen\_Derp1\_90min\_5HCD\_5ETD.raw #4960 RT: 47.86  
FTMS, ETD, z=+5, Mono m/z=651.49890 Da, MH+=3253.46540 Da, Match Tol.=0.05 Da

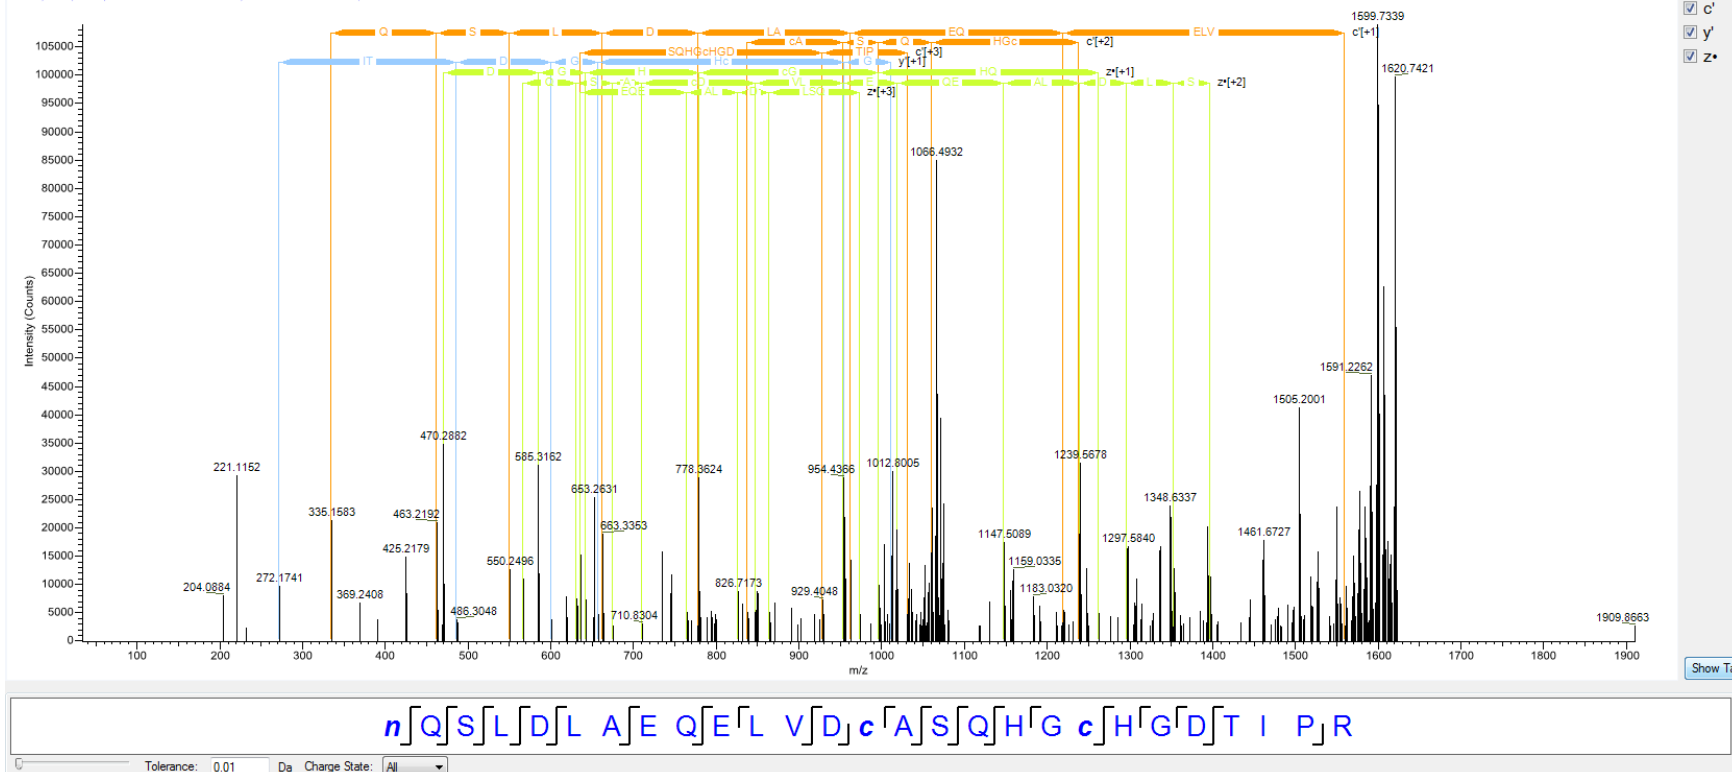

# Supplemental figure 11C

Der p 1

N<sup>150</sup>QSLDLAEQELVDCASQHGCHGDTIPR<sup>176</sup> peptide + 2HexNAc

HCD-MS2

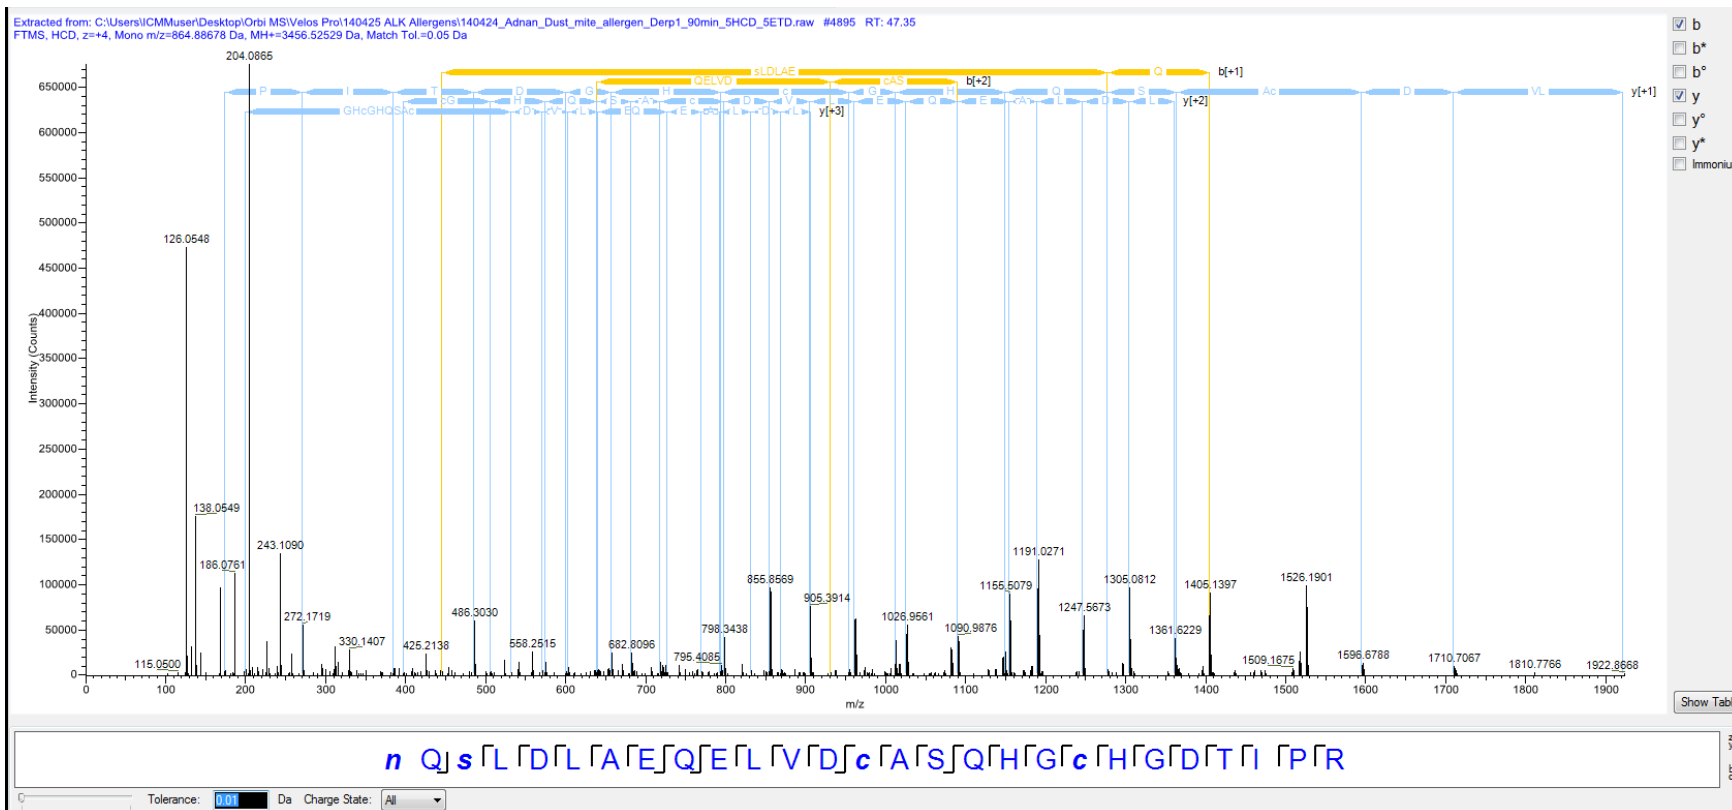

## Supplemental figure 12.

Annotated HCD-MS2 spectra of the tryptic NTSLDLSEQELVDCASQHGCHGDTIPR peptide of Der f 1 modified by (A) 1 HexNAc and (B) 2 HexNAc residues. The b2 and y25 fragment annotations are incorrect.

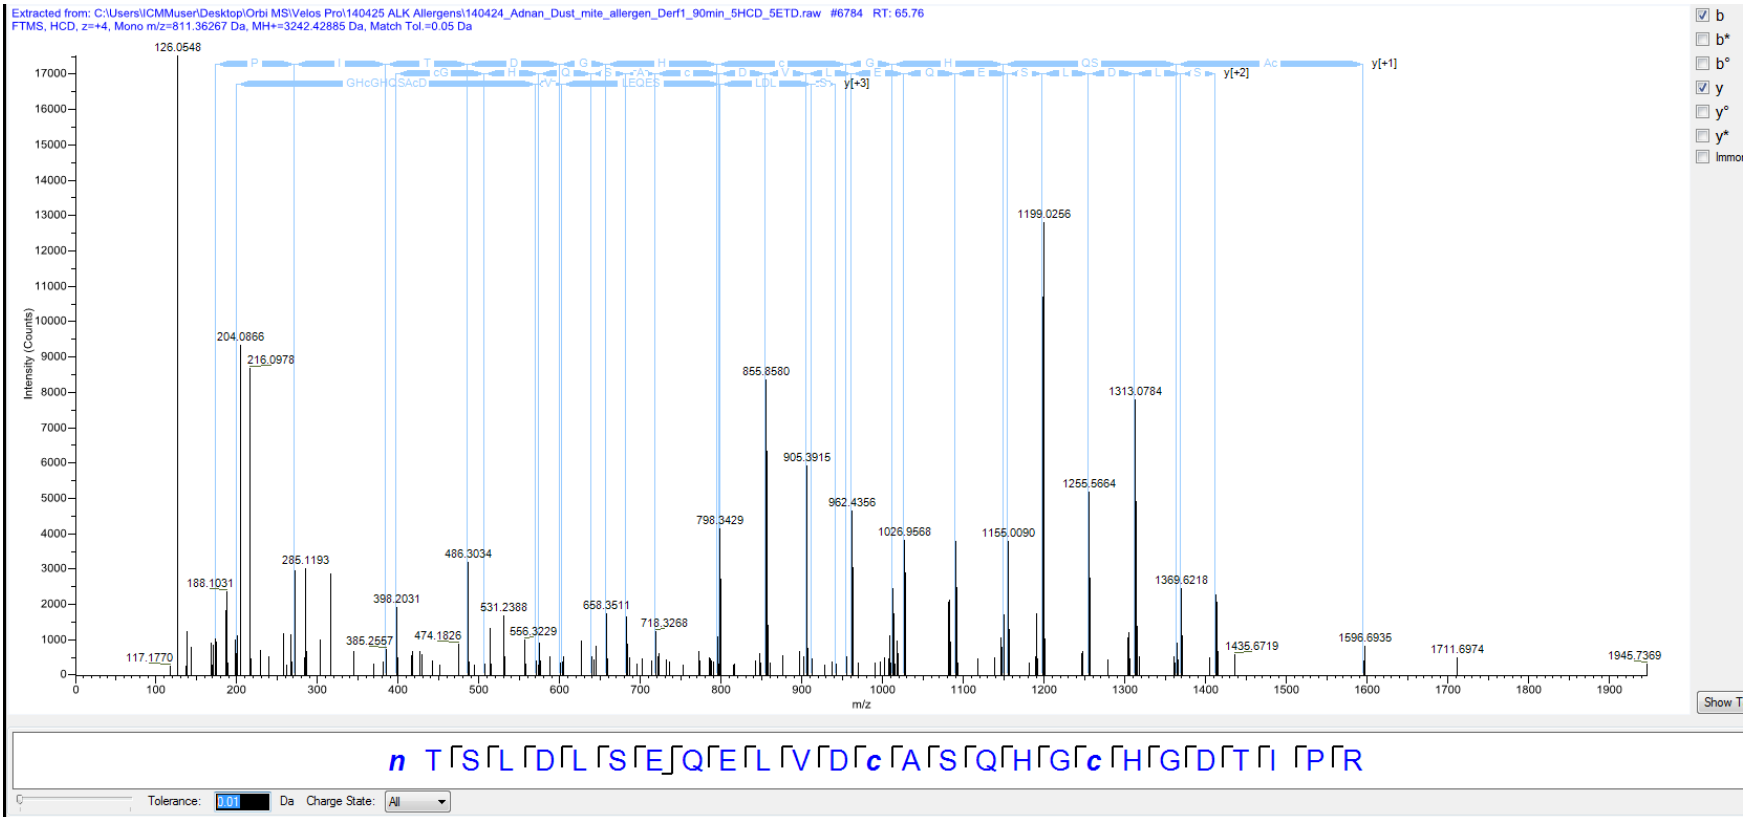

Supplemental figure 12A

Der f 1

N<sup>151</sup>NTSLDLSEQELVDCASQHGCHGDTIPR<sup>177</sup> peptide + 1HexNAc

HCD-MS2

# Supplemental figure 12B

Der f 1

N<sup>151</sup>TSLDLSEQELVDCASQHGCHGDTIPR<sup>177</sup> peptide + 2HexNAc

HCD-MS2

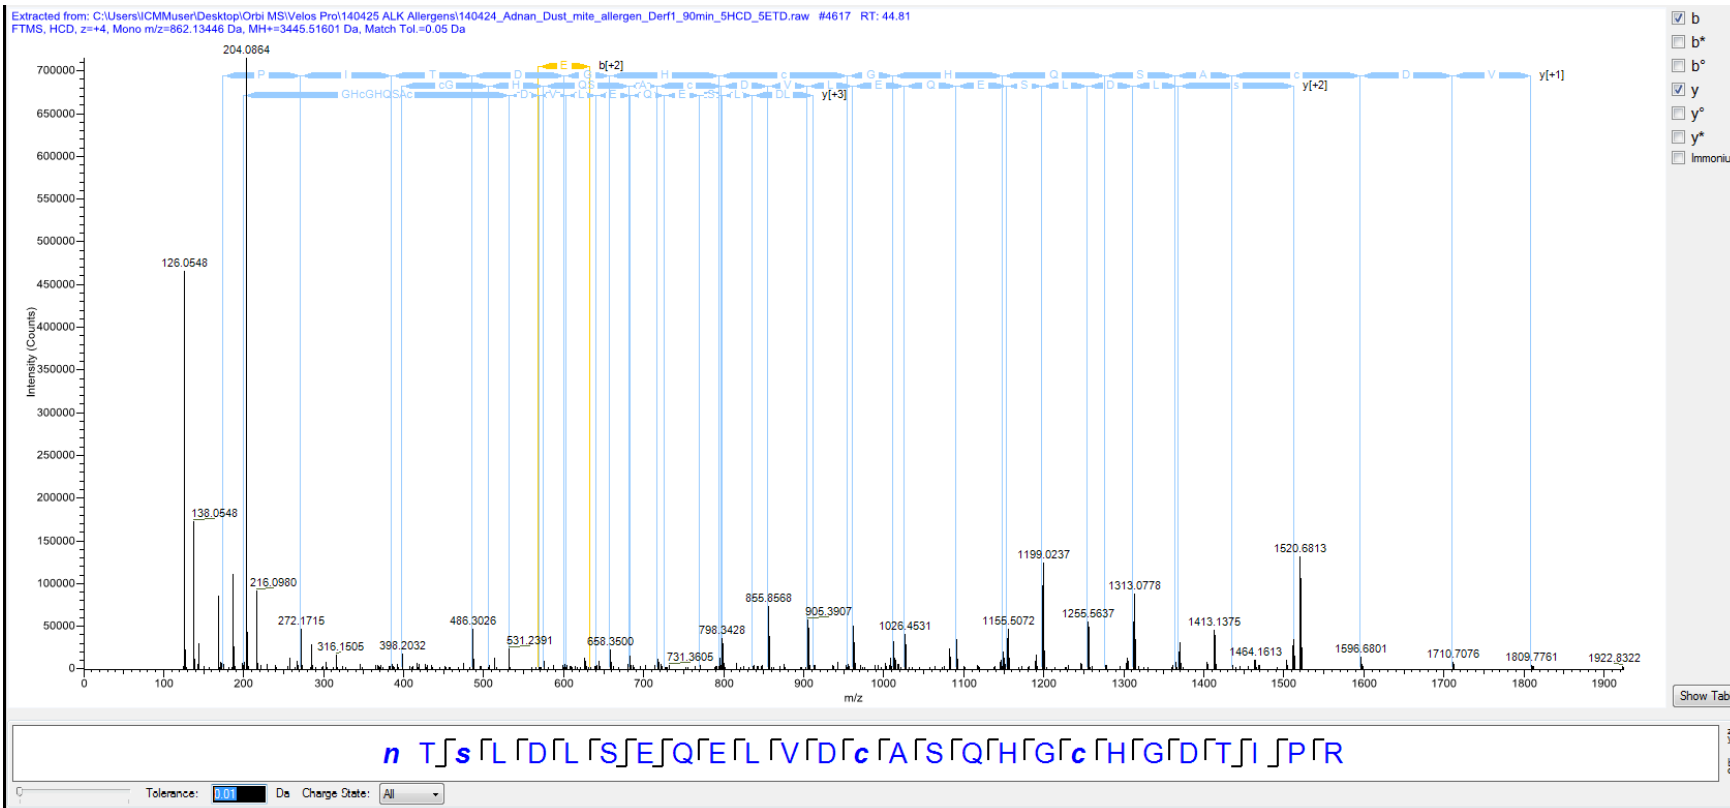

# Supplemental figure 13A

## Der p 1

HCD-MS2 of the E<sup>227</sup>ALAQT<sup>249</sup>HS<sup>249</sup>AI<sup>249</sup>AVI<sup>249</sup>I<sup>249</sup>GI<sup>249</sup>k<sup>249</sup>DL<sup>249</sup>DA<sup>249</sup>FR<sup>249</sup> peptide modified by a single Hex on Lys (indicated as *k*).

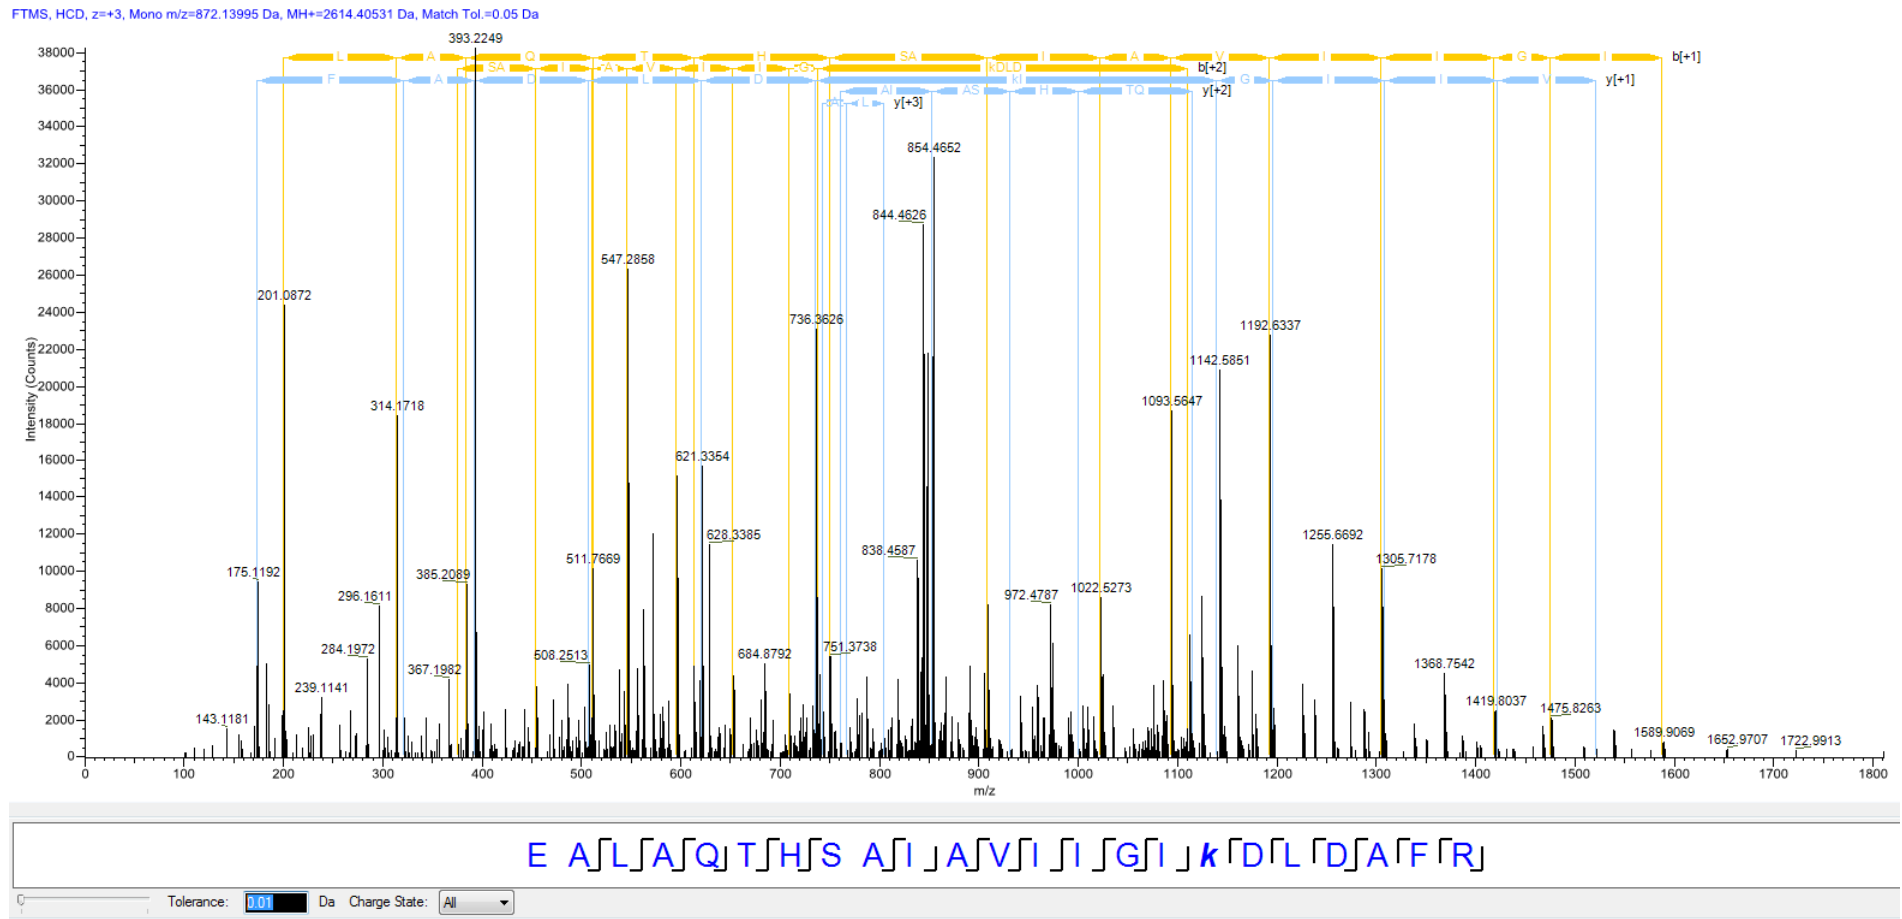

# Supplemental figure 13B

## Der p 1

ETD-MS2 of the E<sup>227</sup>ALAQTHSAIAVIIGIKDLDAFR<sup>249</sup> peptide modified by a single Hex on Lys (indicated as *k*).

FTMS, ETD, z=+4, Mono m/z=654.35748 Da, MH+=2614.40810 Da, Match Tol.=0.05 Da

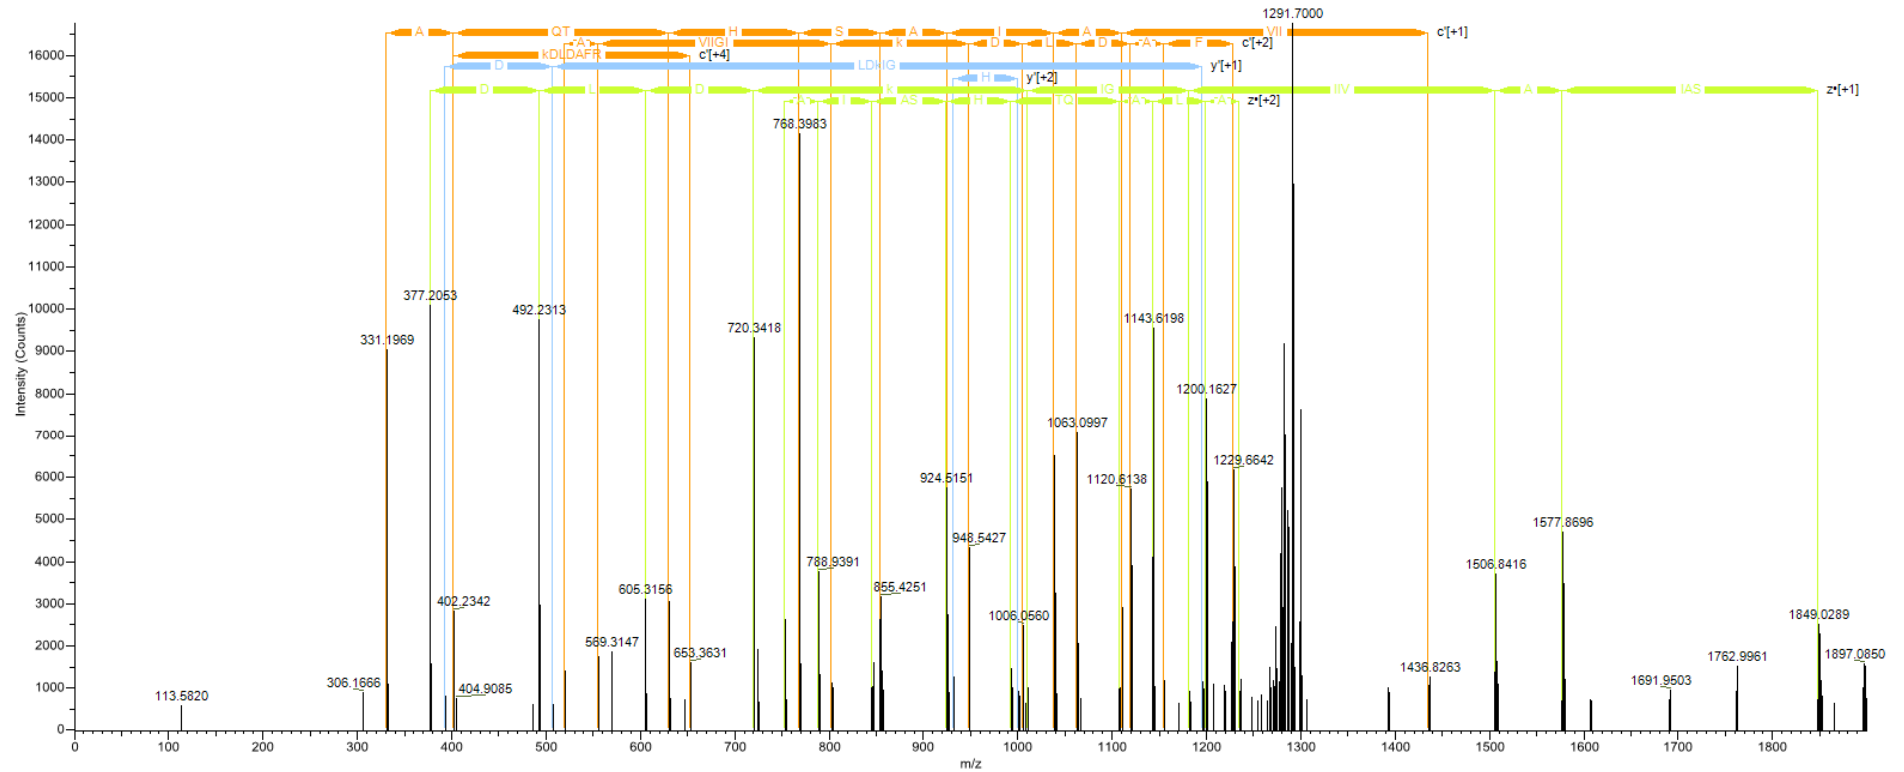

E[A]L[A]Q[T]H[S]A[I]A[V]I[I]G[I]k[D]L[D]A[F]R

Tolerance: 0.01 Da Charge State: All

# Supplemental figure 13C

## Der f 1

HCD-MS2 of the R<sup>204</sup>PNSQHYGISNYCQIYPPDVKQIR<sup>227</sup> peptide modified by a single Hex on Lys (indicated as *k*).

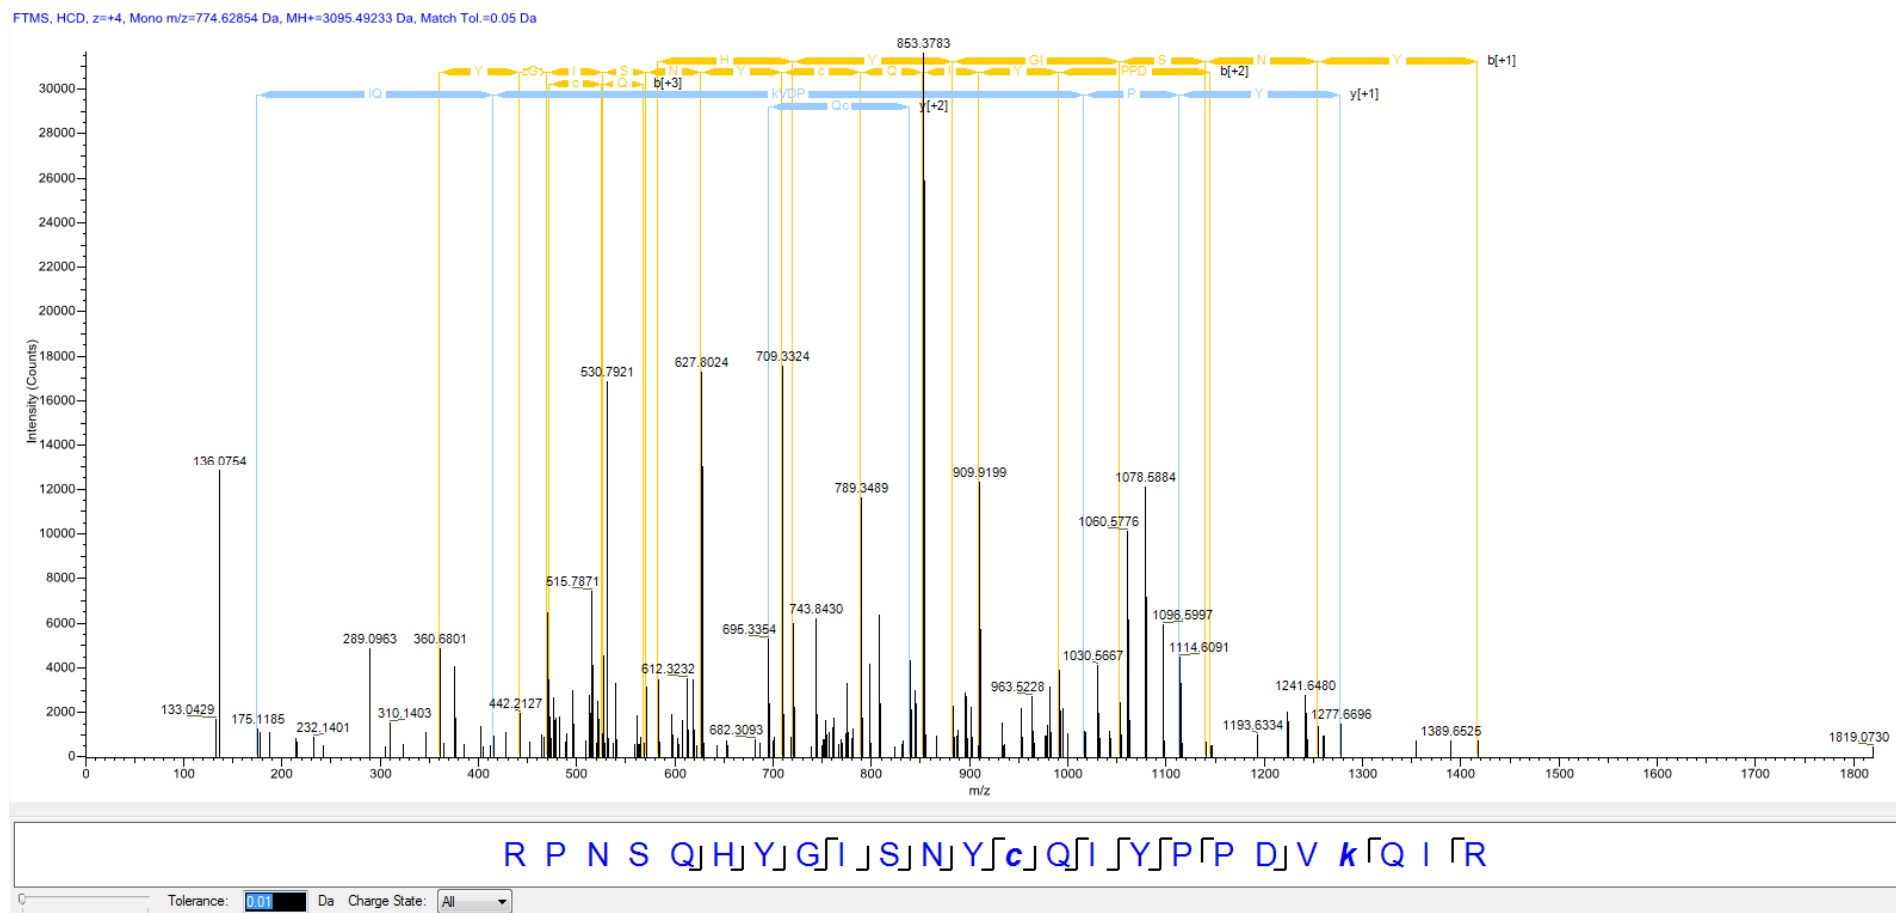

# Supplemental figure 13D

## Der f 1

HCD-MS2 of the E<sup>228</sup>ALTQHTAIAVIIGIKDLR<sup>247</sup> peptide modified by a single Hex on Lys (indicated as *k*).

FTMS, HCD, z=+3, Mono m/z=775.77515 Da, MH+=2325.31089 Da, Match Tol.=0.05 Da

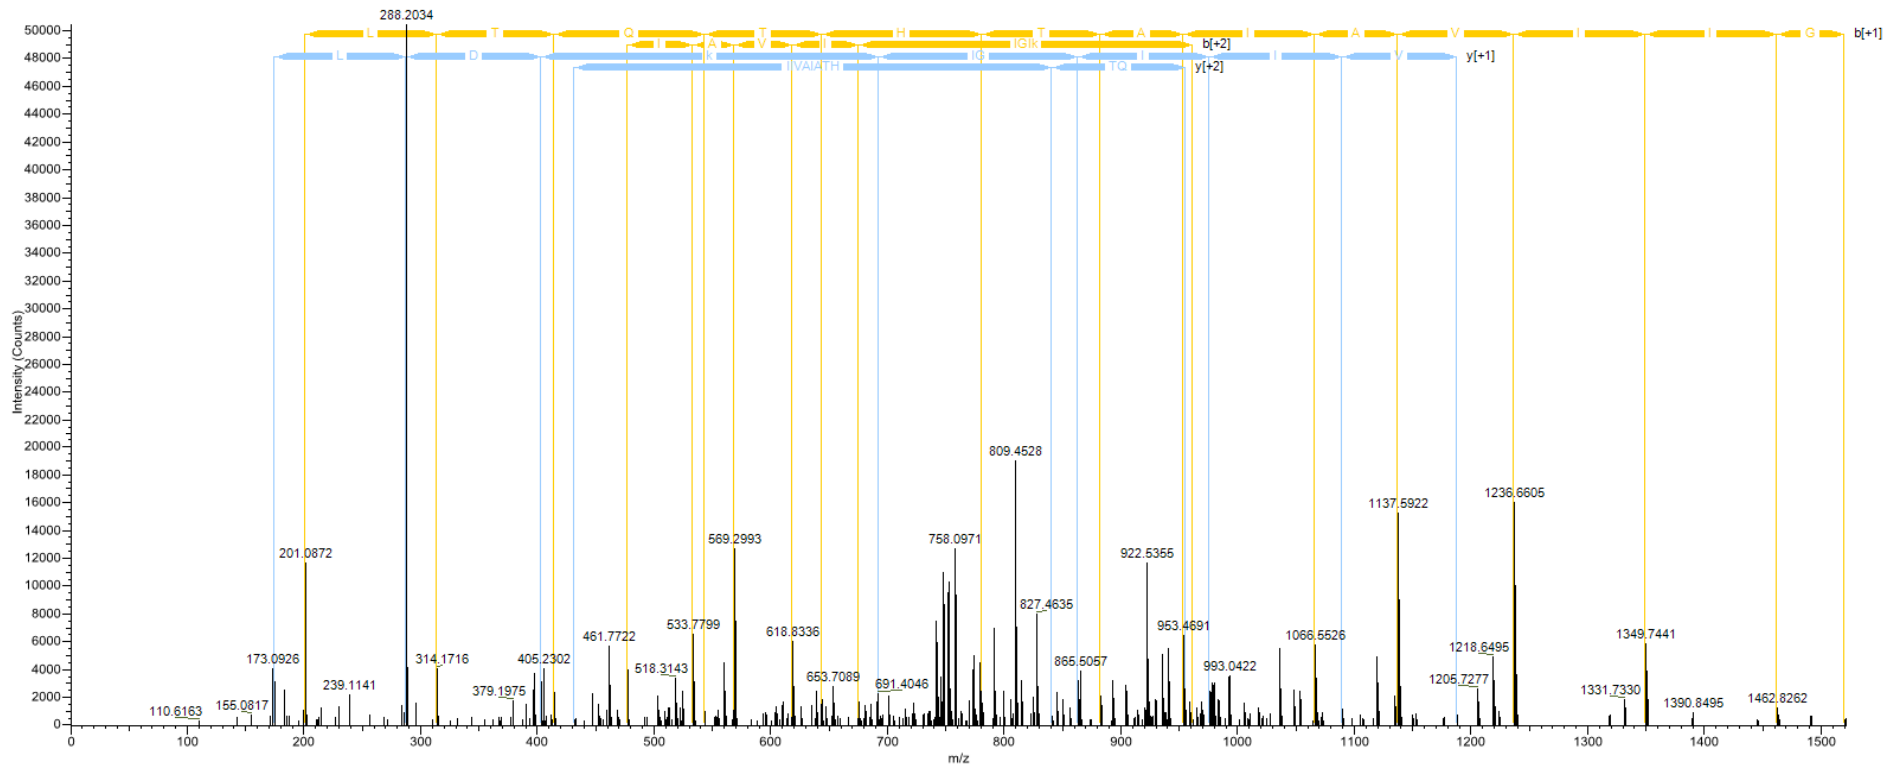

E A L T Q H T A I A V I I G I **k** D L R

Tolerance: 0.01 Da Charge State: All



# Supplemental figure 13E

## Der f 1

ETD-MS2 of the E<sup>228</sup>ALTQHTAIAVIIGIKDLR<sup>247</sup> peptide modified by a single Hex on Lys (indicated as *k*).

FTMS, ETD, z=+4, Mono m/z=582.08325 Da, MH+=2325.31118 Da, Match Tol.=0.05 Da

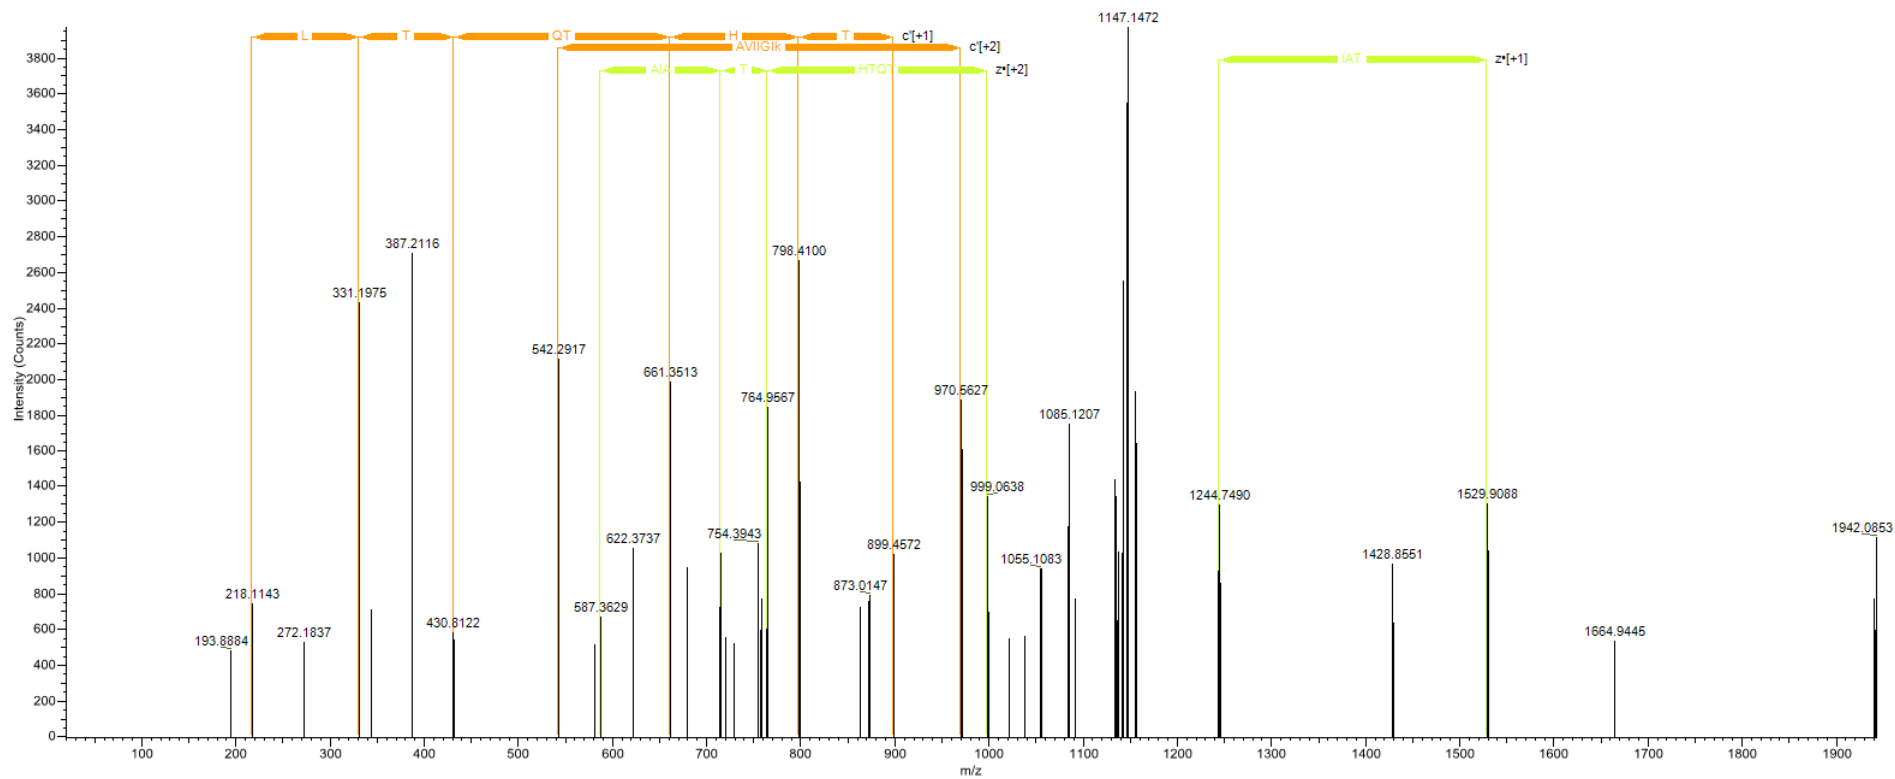

E A L T Q T H T A I A V I I G I *k* D L R

Tolerance: 0.01 Da Charge State: All

## Supplemental figure 14.

Top-down FTMS of Bet v 1 allergen. (A) Charge-state distribution following direct infusion and full MS1 scan at 100000 resolving power at  $m/z$  400.

(B) Deconvoluted MS1 spectra showing the monoisotopic masses of the two most abundant precursor ions (insert).

(C) HCD fragmentation of the intact Bet v 1 allergen.

(D) ETD fragmentation of the intact Bet v 1 allergen.

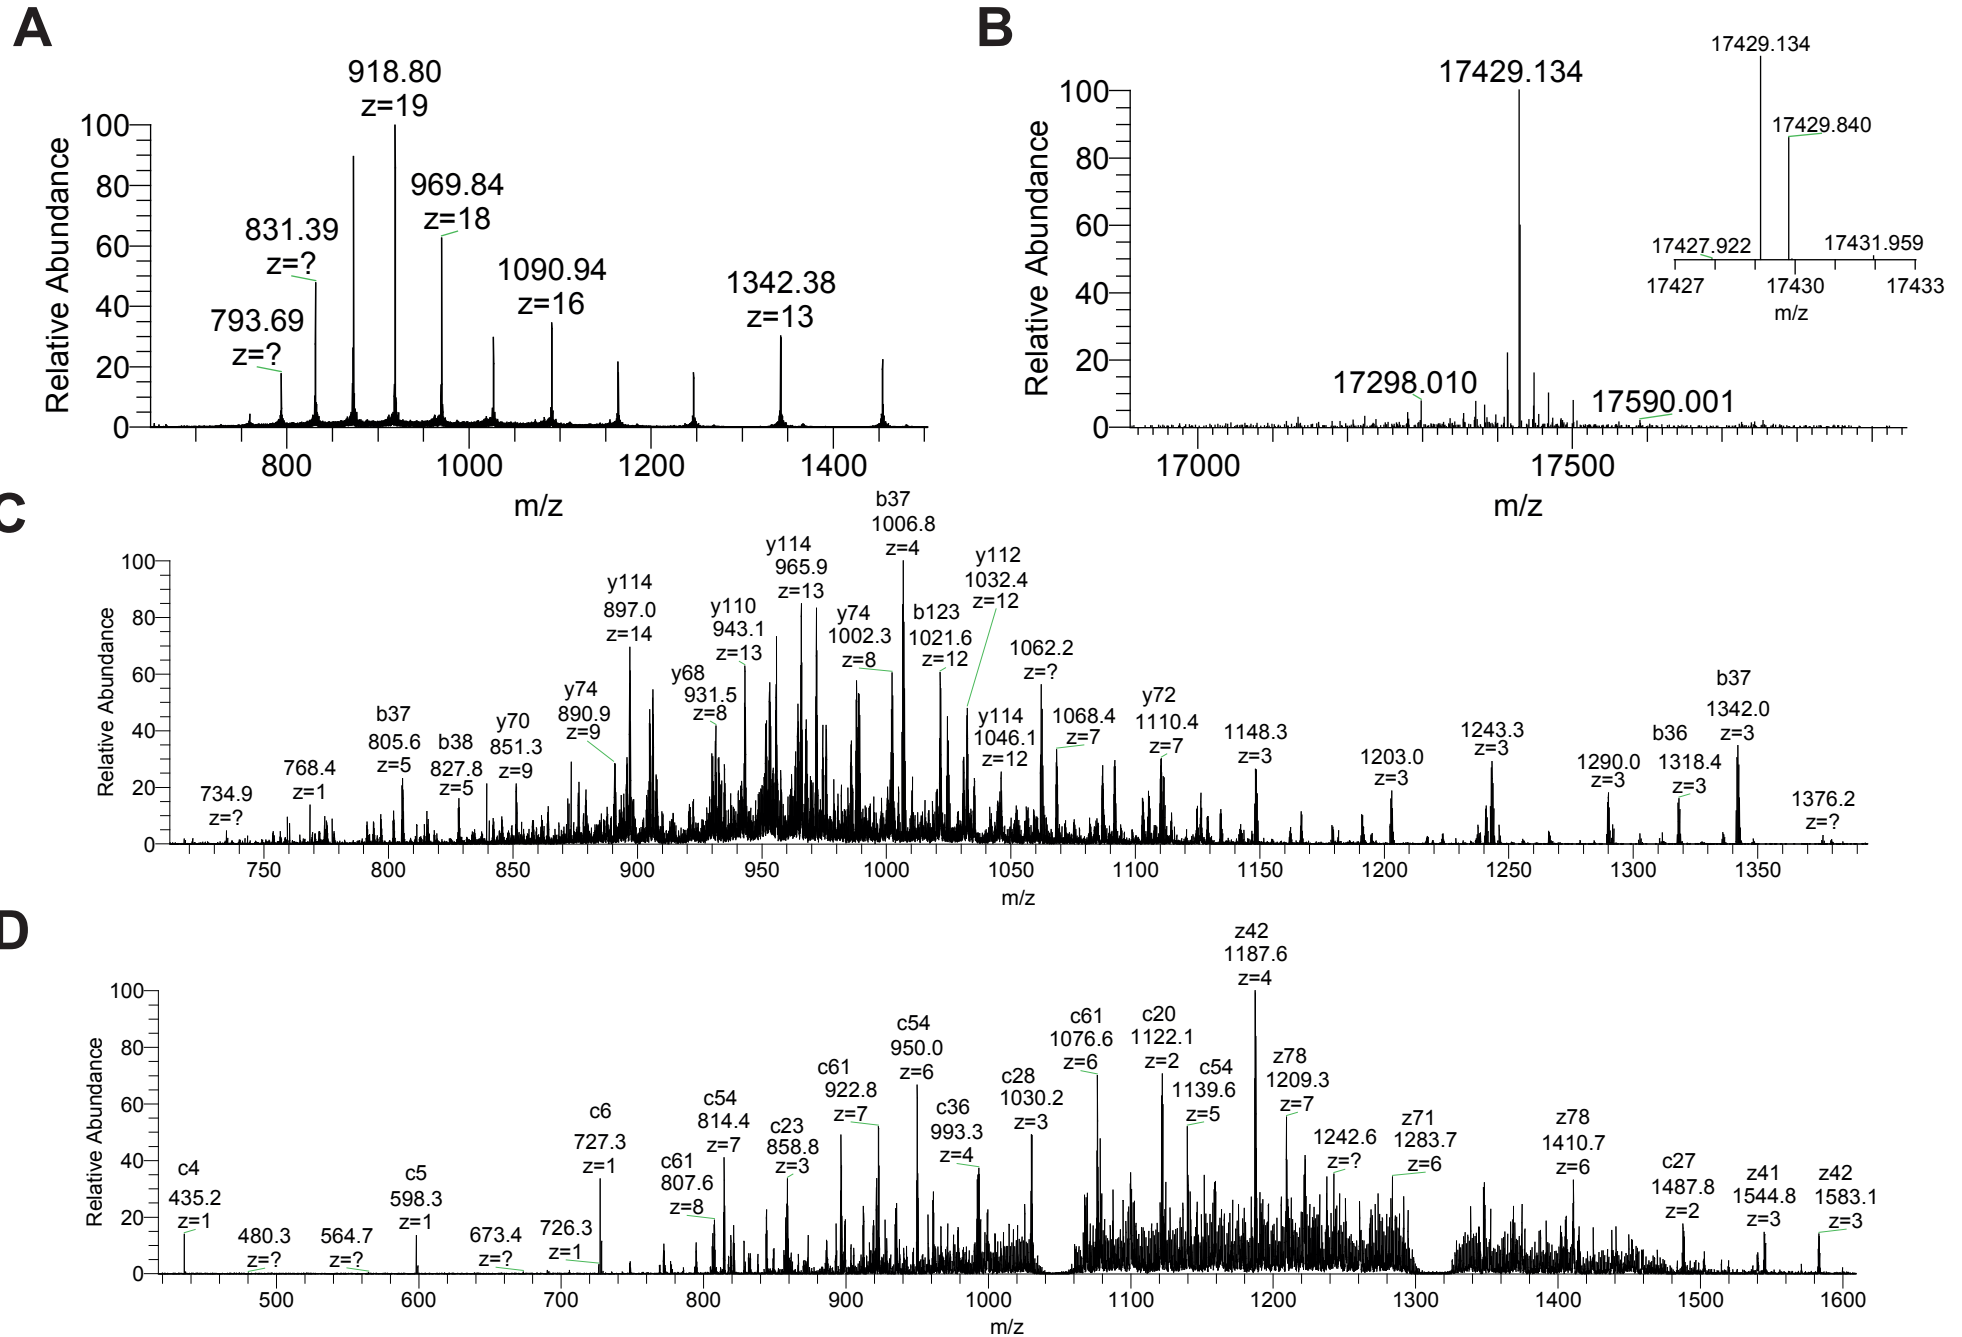

## Supplemental figure 15.

ETD-MS2 analysis of Der p 2 and Der f 2 (shared) peptide CPLVKGQQYDIK modified by 1 hexose.

(A) Annotation of the ETD spectra by Proteome Discoverer 1.4 using variable modification at Ser/Thr/Tyr residues.

(B) Annotation of the ETD spectra by Proteome Discoverer 1.4 using variable modification at Lys/Ser/Thr/Tyr residues.

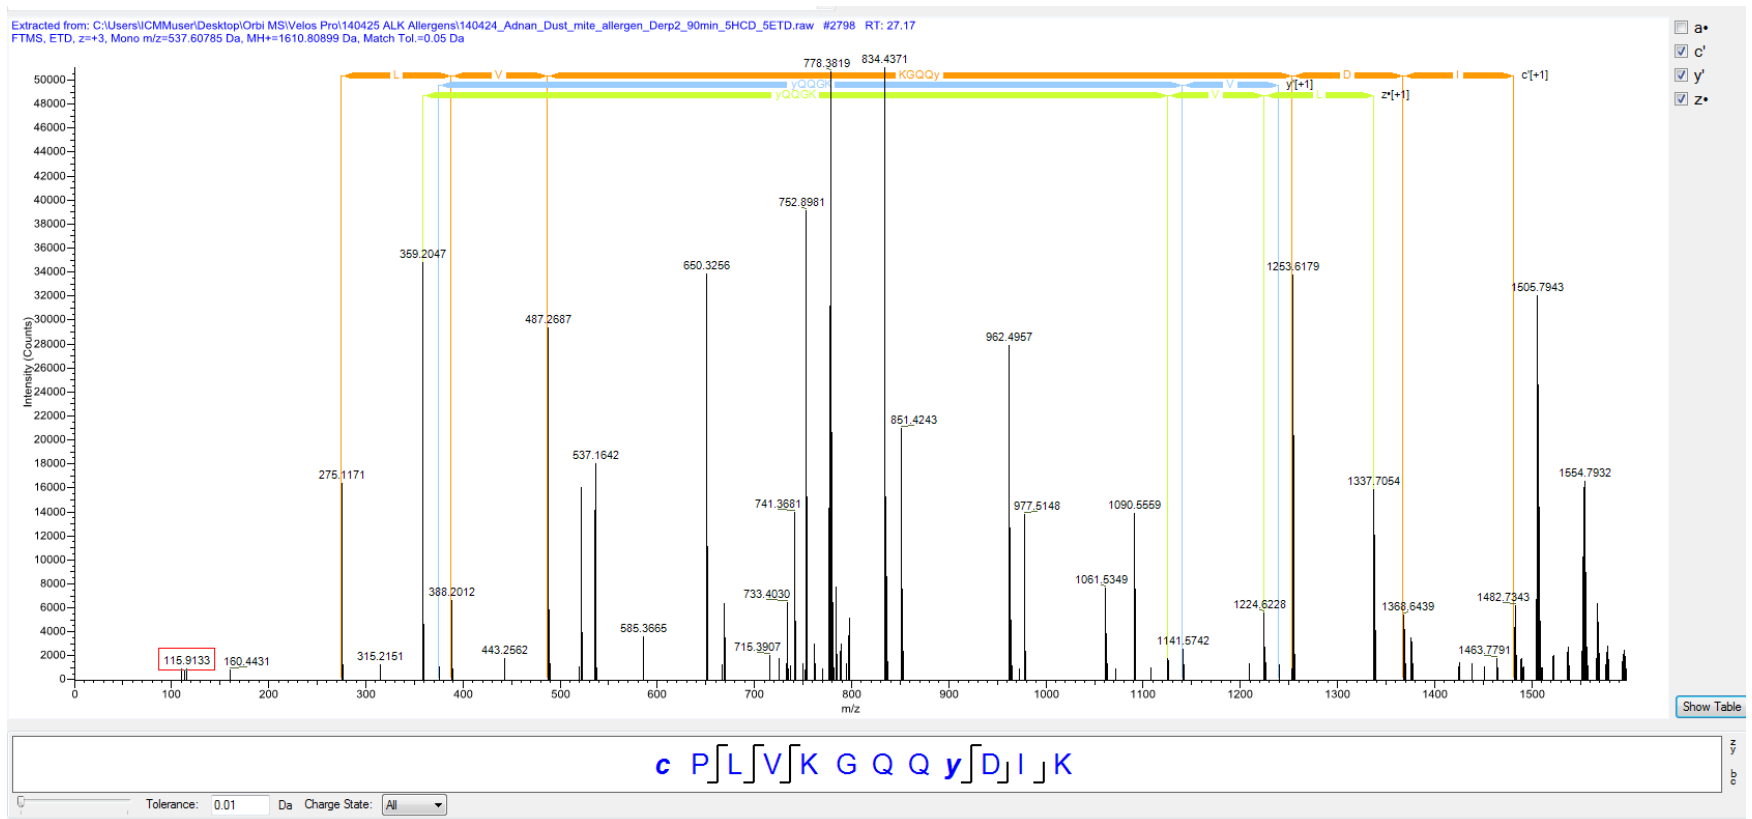

Supplemental figure 15A

Der p 2 and Der f 2

C<sup>95</sup>PLVKGQQYDIK<sup>106</sup> peptide + 1Hex ETD-MS2

Variable Hex modification at Ser/Thr/Tyr

# Supplemental figure 15B

Der p 2 and Der f 2

C<sup>95</sup>PLVKGQQYDIK<sup>106</sup> peptide + 1Hex

ETD-MS2

Variable Hex modification at Lys/Ser/Thr/Tyr

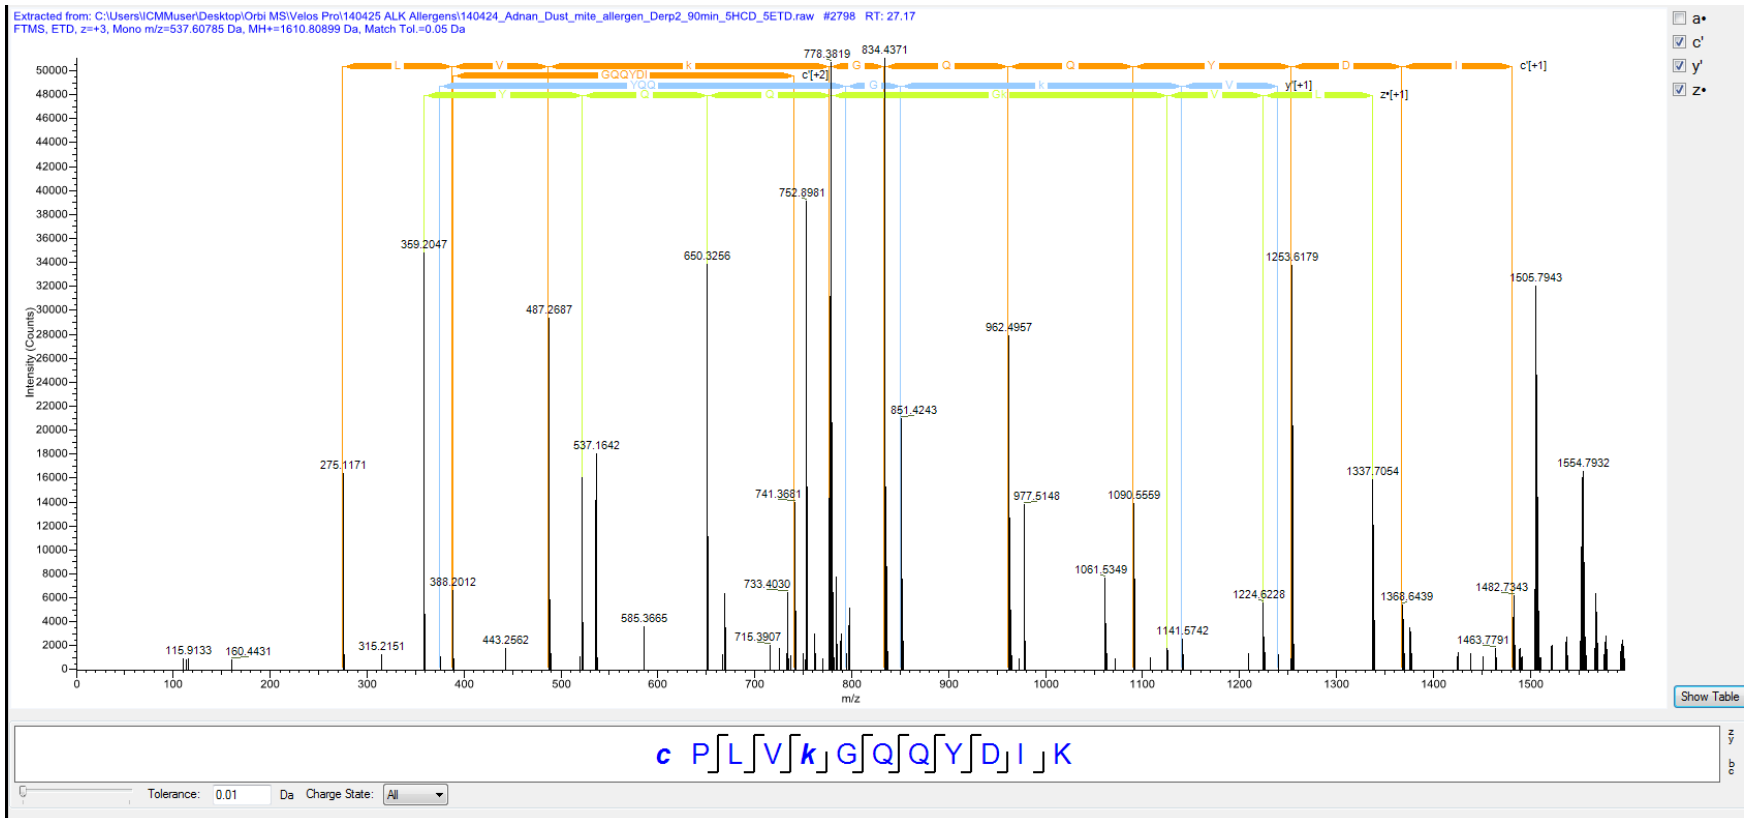

## Supplemental figure 16.

ETD-MS2 analysis of Der p 2 (Uniprot accession I2CMD6) peptide GKPFQLEALFEANQNSKTAK modified by 1 hexose.

(A) Annotation of the ETD spectra by Proteome Discoverer 1.4 using variable modification at Ser/Thr/Tyr residues.

(B) Annotation of the ETD spectra by Proteome Discoverer 1.4 using variable modification at Lys/Ser/Thr/Tyr residues.

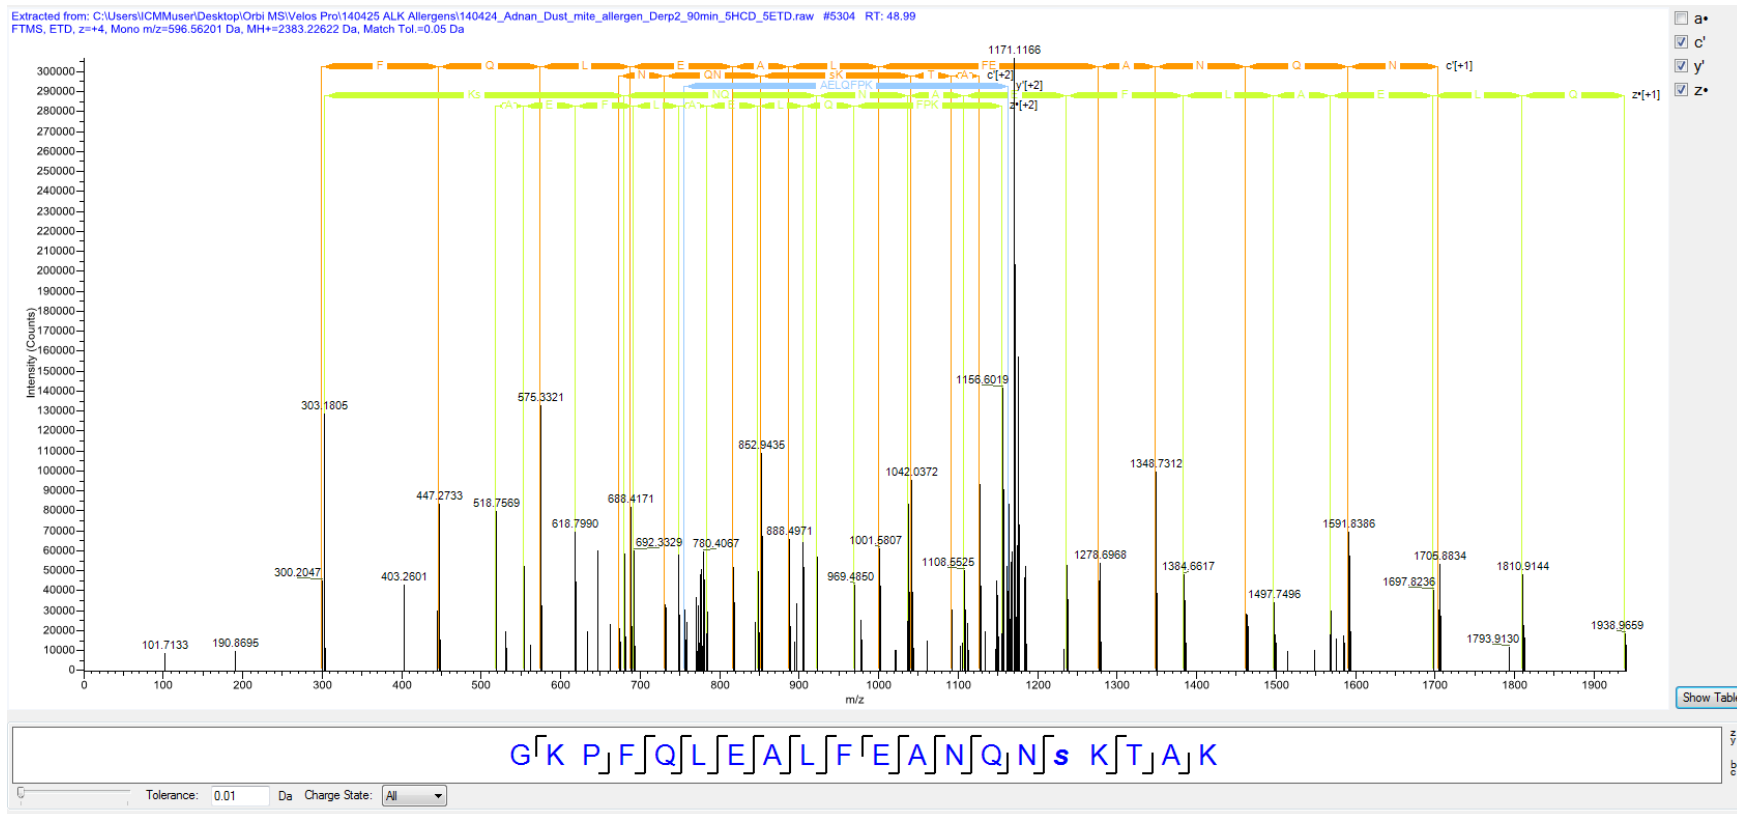

Supplemental figure 16A

Der p 2

G<sup>49</sup>KPFQLEALFEANQNSKTAK<sup>68</sup> peptide + 1Hex ETD-MS2

Variable Hex modification at Ser/Thr/Tyr

# Supplemental figure 16B

Der p 2

G<sup>49</sup>KPFQLEALFEANQNSKTAK<sup>68</sup> peptide + 1Hex

ETD-MS2

Variable Hex modification at Lys/Ser/Thr/Tyr

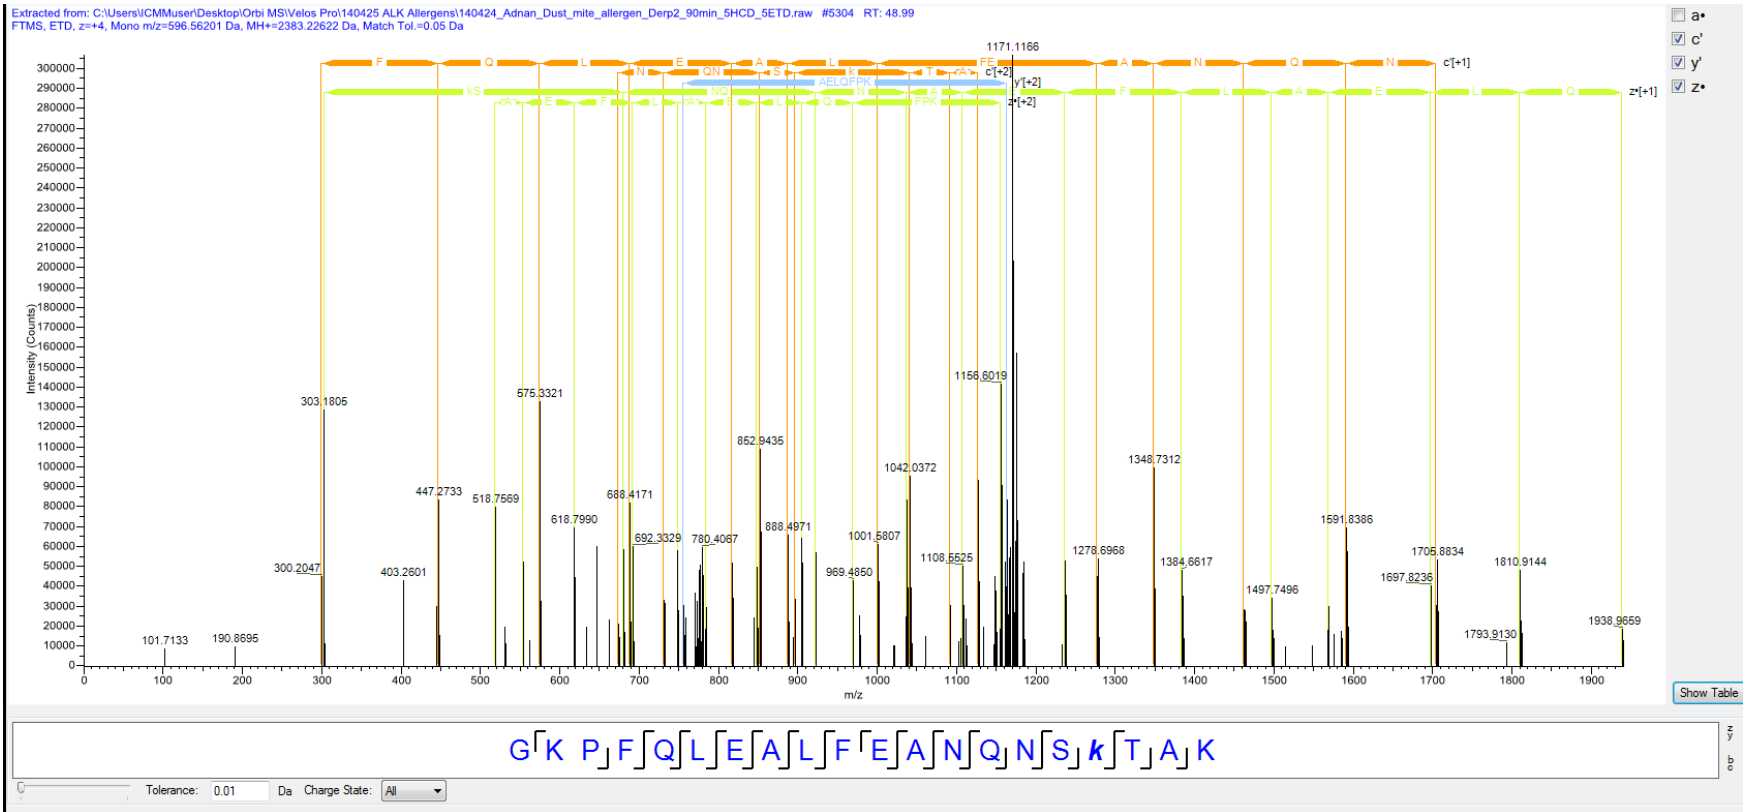

Supplement: supp_M114.042614_mcp.M114.042614-3.pdf [file supp_M114.042614_mcp.M114.042614-3.pdf]
