# Supplementary material
Source: PubMed Central journal article supplement (PMC4288254)
Supplement: supp_M114.042614_mcp.M114.042614-1.pdf [file supp_M114.042614_mcp.M114.042614-1.pdf]

Supplementary Table 1.

PTM modified peptides from grass pollen and dust mite allergen identified by bottom up mass spectrometry. Observed monoisotopic masses are presented as  $[M+H]^+$  together with mass deviation in parts per million (ppm). The MS<sup>2</sup>-column provides a reference to spectra supporting the identifications. For glycopeptide identities inferred only by MS<sup>1</sup> mass measurement, MS<sup>2</sup>-spectra are not available (N/A). Hyp: hydroxyproline; Pen: pentose; dHex: deoxyhexose; Hex: hexose; HexNAc: N-acetylhexosamine.

| Accession | Allergen | Peptide                                                         | Modifications                                                                 | Observed [M+H] <sup>+</sup> | Δppm | MS <sup>2</sup> |
|-----------|----------|-----------------------------------------------------------------|-------------------------------------------------------------------------------|-----------------------------|------|-----------------|
| P43213    | Phl p 1  | V <sup>27</sup> PPGNITATYGDK <sup>40</sup>                      | 1Hyp; Pen <sub>1</sub> dHex <sub>1</sub> Hex <sub>2</sub> HexNAc <sub>2</sub> | 2454.098                    | 2.4  | Fig. S4         |
| P43213    | Phl p 1  | V <sup>27</sup> PPGNITATYGDK <sup>40</sup>                      | 1Hyp; Pen <sub>1</sub> dHex <sub>1</sub> Hex <sub>3</sub> HexNAc <sub>2</sub> | 2616.151                    | 2.3  | Fig. S4         |
| P43213    | Phl p 1  | I <sup>24</sup> PKVPPGNITATYGDK <sup>40</sup>                   | 2Hyp; Pen <sub>1</sub> dHex <sub>1</sub> Hex <sub>2</sub> HexNAc <sub>2</sub> | 2808.330                    | 4.3  | Fig. S4         |
| P43213    | Phl p 1  | I <sup>24</sup> PKVPPGNITATYGDK <sup>40</sup>                   | 2Hyp; Pen <sub>2</sub> dHex <sub>1</sub> Hex <sub>2</sub> HexNAc <sub>2</sub> | 2940.373                    | 4.1  | Fig. S4         |
| P43213    | Phl p 1  | I <sup>24</sup> PKVPPGNITATYGDK <sup>40</sup>                   | 2Hyp; Pen <sub>1</sub> dHex <sub>1</sub> Hex <sub>3</sub> HexNAc <sub>2</sub> | 2970.382                    | 3.7  | Fig. S4         |
| P43213    | Phl p 1  | I <sup>24</sup> PKVPPGNITATYGDK <sup>40</sup>                   | 2Hyp; Pen <sub>3</sub> dHex <sub>1</sub> Hex <sub>2</sub> HexNAc <sub>2</sub> | 3072.411                    | 2.6  | Fig. S4         |
| P43213    | Phl p 1  | I <sup>24</sup> PKVPPGNITATYGDK <sup>40</sup>                   | 2Hyp; Pen <sub>2</sub> dHex <sub>1</sub> Hex <sub>3</sub> HexNAc <sub>2</sub> | 3102.425                    | 3.7  | Fig. S4         |
| P43213    | Phl p 1  | I <sup>24</sup> PKVPPGNITATYGDK <sup>40</sup>                   | 2Hyp; Pen <sub>4</sub> dHex <sub>1</sub> Hex <sub>2</sub> HexNAc <sub>2</sub> | 3204.454                    | 2.7  | Fig. S4         |
| P43213    | Phl p 1  | I <sup>24</sup> PKVPPGNITATYGDK <sup>40</sup>                   | 2Hyp; Pen <sub>3</sub> dHex <sub>1</sub> Hex <sub>3</sub> HexNAc <sub>2</sub> | 3234.464                    | 2.0  | Fig. S4         |
| P43213    | Phl p 1  | I <sup>24</sup> PKVPPGNITATYGDK <sup>40</sup>                   | 2Hyp; Pen <sub>4</sub> dHex <sub>1</sub> Hex <sub>3</sub> HexNAc <sub>2</sub> | 3366.507                    | 2.6  | Fig. S4         |
| Q40960    | Phl p 5a | A <sup>26</sup> DLGYGPATPAAPAAGYTPATPAAPAEAPAGK <sup>58</sup>   | 7Hyp                                                                          | 3076.448                    | 3.0  | Fig. S6         |
| Q40960    | Phl p 5a | A <sup>26</sup> DLGYGPATPAAPAAGYTPATPAAPAEAPAGK <sup>58</sup>   | 7Hyp; Pen <sub>2</sub>                                                        | 3340.516                    | -2.3 | Fig. S6         |
| Q40963    | Phl p 5b | A <sup>20</sup> DAGYAPATPAAGAAAGK <sup>38</sup>                 | 2Hyp                                                                          | 1633.784                    | 1.4  | Fig. S6         |
| Q40963    | Phl p 5b | A <sup>20</sup> DAGYAPATPAAGAAAGK <sup>38</sup>                 | 2Hyp; Pen <sub>1</sub>                                                        | 1765.828                    | 2.0  | Fig. S6         |
| O81341    | Phl p 5  | A <sup>26</sup> DLGYGPATPAAPAAGYTPATPAAPAGAEAPAGK <sup>58</sup> | 6Hyp; Pen <sub>7</sub>                                                        | 3970.723                    | -0.2 | Fig. S7         |
| P08176    | Der p 1  | N <sup>150</sup> QSLDLAEQELVDCASQHGCHGDTIPR <sup>176</sup>      | HexNAc                                                                        | 3253.467                    | 5.7  | Fig. S11        |
| P08176    | Der p 1  | N <sup>150</sup> QSLDLAEQELVDCASQHGCHGDTIPR <sup>176</sup>      | HexNAc <sub>2</sub>                                                           | 3456.536                    | 2.4  | Fig. S11        |
| P08176    | Der p 1  | E <sup>227</sup> ALAQTHSAIAVIIGIKDLDAFR <sup>249</sup>          | Hex                                                                           | 2614.405                    | -1.3 | Fig. S13        |
| P16311    | Der f 1  | N <sup>151</sup> TSLDLSEQELVDCASQHGCHGDTIPR <sup>177</sup>      | HexNAc                                                                        | 3242.448                    | 4.6  | Fig. S12        |
| P16311    | Der f 1  | N <sup>151</sup> TSLDLSEQELVDCASQHGCHGDTIPR <sup>177</sup>      | HexNAc <sub>2</sub>                                                           | 3445.520                    | 2.9  | Fig. S12        |
| P16311    | Der f 1  | R <sup>204</sup> PNSQHYGISNYCQYPPDVQKIR <sup>227</sup>          | Hex                                                                           | 3095.492                    | -2.6 | Fig. S13        |
| P16311    | Der f 1  | E <sup>228</sup> ALTQHTAIIVIGIKDLR <sup>247</sup>               | Hex                                                                           | 2325.311                    | 3.6  | Fig. S13        |
| P49278    | Der p 2  | G <sup>49</sup> KPFQLEAVFEANQNTKTAK <sup>68</sup>               | Hex                                                                           | 2383.221                    | 2.7  | Fig. S8         |
| P49278    | Der p 2  | G <sup>49</sup> KPFQLEAVFEANQNTKTAK <sup>68</sup>               | Hex <sub>2</sub>                                                              | 2545.265                    | -0.9 | Fig. S8         |
| P49278    | Der p 2  | G <sup>49</sup> KPFQLEAVFEANQNTKTAK <sup>68</sup>               | Hex <sub>3</sub>                                                              | 2707.324                    | 1.6  | N/A             |
| P49278    | Der p 2  | G <sup>49</sup> KPFQLEAVFEANQNTKTAK <sup>68</sup>               | Hex <sub>4</sub>                                                              | 2869.377                    | 1.6  | N/A             |
| P49278    | Der p 2  | G <sup>49</sup> KPFQLEAVFEANQNTKTAK <sup>68</sup>               | Hex <sub>5</sub>                                                              | 3031.424                    | -0.5 | N/A             |
| P49278    | Der p 2  | C <sup>95</sup> PLVKGQQYDIK <sup>106</sup>                      | Hex                                                                           | 1610.813                    | 2.1  | Fig. S15        |
| P49278    | Der p 2  | G <sup>100</sup> QQYDIKYTWNVPK <sup>113</sup>                   | Hex                                                                           | 1901.930                    | 0.9  | Fig. S8         |
| P49278    | Der p 2  | I <sup>114</sup> APKSENVVTVK <sup>126</sup>                     | Hex                                                                           | 1545.880                    | 1.2  | Fig. S8         |
| Q00855    | Der f 2  | C <sup>95</sup> PLVKGQQYDIK <sup>106</sup>                      | Hex                                                                           | 1610.812                    | 1.2  | Fig. S9         |
| Q00855    | Der f 2  | G <sup>49</sup> KPFTLEALFDANQNTK <sup>65</sup>                  | Hex                                                                           | 2056.030                    | 3.2  | Fig 4           |
| Q00855    | Der f 2  | G <sup>49</sup> KPFTLEALFDANQNTK <sup>65</sup>                  | Hex <sub>2</sub>                                                              | 2218.080                    | 1.8  | N/A             |
| Q00855    | Der f 2  | G <sup>49</sup> KPFTLEALFDANQNTK <sup>65</sup>                  | Hex <sub>3</sub>                                                              | 2380.132                    | 1.3  | N/A             |
| Q00855    | Der f 2  | G <sup>49</sup> KPFTLEALFDANQNTK <sup>65</sup>                  | Hex <sub>4</sub>                                                              | 2542.185                    | 1.3  | N/A             |
| Q00855    | Der f 2  | G <sup>49</sup> KPFTLEALFDANQNTK <sup>65</sup>                  | Hex <sub>5</sub>                                                              | 2704.239                    | 1.6  | N/A             |
| Q00855    | Der f 2  | G <sup>49</sup> KPFTLEALFDANQNTK <sup>65</sup>                  | Hex <sub>6</sub>                                                              | 2866.291                    | 1.3  | N/A             |
| Q00855    | Der f 2  | G <sup>49</sup> KPFTLEALFDANQNTK <sup>65</sup>                  | Hex <sub>7</sub>                                                              | 3028.345                    | 1.6  | N/A             |
| Q00855    | Der f 2  | G <sup>49</sup> KPFTLEALFDANQNTK <sup>65</sup>                  | Hex <sub>8</sub>                                                              | 3190.405                    | 3.8  | N/A             |
| Q00855    | Der f 2  | G <sup>49</sup> KPFTLEALFDANQNTK <sup>65</sup>                  | Hex <sub>9</sub>                                                              | 3352.455                    | 2.8  | N/A             |
| Q00855    | Der f 2  | G <sup>100</sup> QQYDIKYTWNVPK <sup>113</sup>                   | Hex                                                                           | 1901.932                    | 2.2  | Fig. S8         |
| Q00855    | Der f 2  | G <sup>100</sup> QQYDIKYTWNVPK <sup>113</sup>                   | Hex <sub>2</sub>                                                              | 2063.983                    | 1.1  | N/A             |
| Q00855    | Der f 2  | I <sup>114</sup> APKSENVVTVK <sup>126</sup>                     | Hex                                                                           | 1545.873                    | -0.2 | Fig. S9         |
